# Supplementary material for: Genes whose gain or loss-of-function changes type 1, 2A, 2X or 2B muscle fibre proportions in mice: A systematic literature review
Source: Research Square preprint supplement (doi:10.21203/rs.3.rs-1519277/v1), 2022-05-03
Supplement: Supplementary file 1 [file 93b0eb1cf896f8b823a229d3.xlsx]

## Sheet: Introduction
Gene symbol by PubMed	Muscle fibre type phenotypes
Bdkrb2	Knockout increasess type I fibre percentage in soleus by 7.1%
	Knockout decreasess type IIA fibre percentage in soleus by 15.3%
	Knockout increasess intermediary fibre type in soleus by 8.2%
Bdnf	Knockout increasess type IIX fibres in TA by 7.1%
	Knockout decreases type IIB fibres in TA by 9%
	Knockout increases type fibre IIX in EDL by 5.9%
	Knockout decreases type IIB fibres in EDL by 7.8%
Camk4	Knockout increases type I fibres in soleus by 19.8%
	Knockout decreases type IIA fibres in soleus by 12%
	Knockout decreases other type fibres in soleus by 7.3%
Ccnd3	Knockout increases type IIA fibres in TA by 7.1%
	Knockout decreases type IIB fibres in TA by 9.7%
Cpt1a	Knockout increases type IIA fibres in TA by 11%
Foxj3	Knockout decreases type I fibres in EDL by 3.5%
	Knockout decreases type I fibres in soleus by 18%
Foxo1	Overexpression decreases type I fibres in soleus by 10%
	Overexpression increases type fibre II in soleus by 10%
Mapk12	Knockout increases type I fibres in soleus by 15.7%
	Knockout decreases type IIA fibres in soleus by 15.7%
Mstn	Knockout decreases type I fibres in biceps femoris by 1.7%
	Knockout decreases type IIA fibres in biceps femoris by 4.6%
	Knockout increases type IIB/X fibres in biceps femoris by 6%
	Knockout descrease type IIA fibres in TA by 5%
	Knockout increases type IIB/X fibres in TA by 5%
Myod1	Knockout increases type I fibres in EDL by 5.3%
Nfatc1	Knockout descrease type I in soleus by 1.9%
Nol3	Knockout decreases type I fibres in soleus by 3.5%
	Knockout increases type IIA fibres in soleus by 4.4%
	Knockout decreases type IIA fibres in plantaris by 9.4%
	Knockout increases type IIB fibres in plantaris by 13.4%
Ppargc1a	Overexpression increases type I fibres in plantaris by 14.8%
	Overexpression increases type IIA fibres in plantaris by 22.2%
	Overexpression decreases type IIB fibres in plantaris by 37%
Thra	Knockout increases type I fibres in soleus by 20.8%
	Knockout descrease type IIA fibres in soleus by 22%
Thrb	Knockout decreases type I fibres in soleus by 2,7%
	Knockout increases type IIA fibres in soleus by 2.5%
Esrrg	Overexpression increases MHC type IIA expression in gastrocnemius by 9.6%
	Overexpression decreases MHC type IIB expression in gastrocnemius by 15.4%
Il15	Overexpression increases MHC type I expression in soleus by 31.2%
	Overexpression decreases MHC type IIA expression in soleus by 27.6%
	Overexpression decreases MHC type IIX expression in soleus by 3.7%
	Overexpression increases MHC type I expression in EDL by 3.3%
	Overexpression increases MHC type IIX in expression EDL by 13.7%
	Overexpression increases MHC type I expression in gastrocnemius by 19.5%
Ncor1	Knockout increases MHC type IIA expression in gastrocnemius by 2.3%
	Knockout increases MHC type IIX expression in gastrocnemius by 6.1%
	Knockout increases MHC type I expression in quadriceps by 6.1%
	Knockout increases MHC type IIA expression in quadriceps by 1.7%
	Knockout increases MHC type IIX expression in quadriceps by 2.8%
Ppargc1b	Overexpression decreases MHC type I expression in gastrocnemius by 19.2%
	Overexpression increases MHC type IIX expression in gastrocnemius by 50.8%
	Overexpression decreases MHC type IIB expression in gastrocnemius by 19.2%
	Overexpression decreases MHC type I expression in EDL by 21.6%
	Overexpression decreases MHC type IIA expression in EDL by 13.6%
	Overexpression increases MHC type IIX expression in EDL by 42.4%
	Overexpression decreases MHC type IIB expression in EDL by 7.1%
	Overexpression decreases MHC type IIA expression in TA by 10,9%
	Overexpression increases MHC type IIX expression in TA by 25,7%
	Overexpression decreases MHC type IIB expression in TA by 13,2%
Sirt3	Overexpression increases MHC type I expression in quadriceps by 49.3%
	Overexpression decreases MHC type IIB expression in quadriceos by 24.8%
Trib3	Overexpression increases MHC type I expression in soleus by 23%
	Overexpression decreases MHC type IIB expression in soleus by 30%
	Overexpression decreases MHC type IIB expression in TA by 20%
Akirin1	Overexpression decreases type I fibres in quadriceps by 5.2%
	Overexpression increases type IIA fibres in quadriceps by 7.7%
	Overexpression decreases MHC type I expression in quadriceps by 14.6%
	Overexpression increases MHC type IIA expression in quadriceos by 22.9%
Epas1	Knockout decreases type I fibres in soleus by 36.7%
	Knockout increases type IIB fibres in soleus by 28.2%
	Knockout decreases MHC type I expression in soleus by 13%
	Knockout increases MHC type IIB expression in soleus by 17.9%
Sirt1	Overexpression increases type I fibres in gastrocnemius by 1.7%
	Overexpression decreases type fibre II in gastrocnemius by 1.3%
	Overexpression increse MHC type IIA expression in gastrocnemius by 3.3%
	Overexpression increases MHC type IIX expression in gastrocnemius By 5.4%
	Overexpression decreases MHC type IIB expression in gastrocnemius By 19.3%
Vgll2	Knockout decreases type fobre IIA in soleus by 16%
	Knockout increases type IIB fibres in soleus by 16.7%
	Knockout decreases MHC type I expression in soleus by 21.4%
	Knockout decreases MHC type IIA in soleus by 24.3%
	Knockout increases MHC type IIX in soleus by 9.4%
	Knockout increases MHC type IIB in soleus by 36.3%

## Sheet: S1 Prisma flowchart
Figure S1. Flowchart summarising the systematic review process

## Sheet: S2 Results summary table
Table S2. Information about the muscle fibre genes identified in this systematic review
Study	Pubmed-ID (PMID)	Gene symbol by GeneCards	Aliases in mice and humans	Gene symbol used in the paper	Gene/protein	Knock out or overexpression	Methods	Acclimated	Fiber type analyze procedure	Data extraction	Output measure	Transgenic mice	Wild type	Difference % in total area	Age of mice during	Mouse strain (background)	Additional measurements Increased in transgenic mice compared to control	Additional measurements Decreased in transgenic mice compared to control	Additional measurements No difference transgenic and control mice	Remarks
Reis et al., 2015	PMID: 26302153	Bdkrb2	B(2), B2, B2R, BK-2, BK2, BK2R, BKR2, BRB2 B2R, BK-2, BK2, BKR2, BRB2	B2R	Bradykinin receptor, beta 2	Global Knockout	C57BL6/J wild type (WT) and age matched C57BL6/J B2R knockout mice (B2R-/-)	Mices were housed cages at 22°C with a 12-h dark-light cycle, and ad libitum access to food and water.	ATPase staining	Fig 5. B	Soleus % type fiber I (* ) Soleus % type fiber IIA (*) Soleus % type fiber Intermediary % (*)	39 49 10	32 64 2	7.1 -15.3 8.2	12- to 18-week-old males	C57BL6/J	Energy expenditure, Epididymal, perirenal fat contetn and total body weight after GFD treatment, gluocse intolerance in HFD, glucose uptake after insulin estimulation, insulin in glycogen levels, Oxygem consumption, CO2 production, mitochondrial activity, superoxide anion levels, time swimming in swimming exhaustive test.	Feed efficiency, leptin and insulin content, Effort at the same percentage od VO2max in treadmill test, respiratory quotient.	Insulin sensitivity in control diet, glucose uptake in muscle at basal level, synthesis of glycogen, VO2max, no difference in the cross-sectional area of intermediary fibers.	The higher percentage of oxidative skeletal muscle fibers in B2R-/- mice was coupled with an increased aerobic performance. The B2R-/- animals have a higher mitochondrial activity and higher amount of mitochondria in skeletal muscle.
Delezie et al., 2019	PMID: 31320589	Bdnf	ANON2, BULN2	Bdnf	Brain derived neurotrophic factor	Global Knockout	Bdnfflox/flox crossed with C57BL6/J	Mices were housed cages at 21°C-22°C with a 12-h dark-light cycle,in standard cages with enrichment and free access to regular chow diet	MHC immunohistochemistry	Fig. 5. B	TA % type fiber IIX (*) TA % type fiber IIB (*) EDL % type fiber IIX (*) EDL % type fiber IIB (*)	47 40 30 51	40 48 24 58	7.1 -9.0 5.9 -7.8	3 to 4 months old	C57BL6/J	NT-3 in gastrocnemius, time-to-peak tension and half relaxation time, muscle recovered, overnight wheel activity, distance run, blood lactate levels at exhaustion, SDH, Actin gene, Ppargc1b, mitochondrial DNA levels Glycolytic markers, Baf60c, 24-mo-old mice grip strength and type IIA.	Ovidative and glycolitic skeletal muscle, NT-4/5 in gastrocnemius, nighttime general locomotor activity, gait velocity, motor end plate volume, blood glucose at exhaustion, troponin-C, Baf60c/Smard3, Tbx15, Atp2a1.	TrkB, food intake, body, lean and fat mass, glucose tolerance, daily body temperature, VO2 consumption, or energy substrate utilization, whole-body lean mass, individual weights of different oxidative and glycolytic muscles , MusK protein at sinaptic sites, α-and e-AChR subunits, molecules involved in NMJ maintenance, pre and post synaptic structure, twitch and tetanic force, plasma lactate accum…	Muscle-specific loss of BDNF confers beneficial effects on endurance and mitigates loss of muscle mass and function in sarcopenia.
Akimoto et al., 2004	PMID: 15229108	CamK4	A430110E23Rik, AI666733, CaMKIV, CaMKIV/Gr, D18Bwg0362e CaMK IV, CaMK-GR, CaMKIV, caMK	Camk4	Calcium/calmodulin-dependent protein kinase IV	Global Knockout	Mice carrying a null mutation of the Camk4 gene were generated by using homologous recombination in embryonic stem cells	Mices were housed cages with a 12-h dark-light cycle	MHC indirect immunofluorescence	Table 1	Soleus % type fiber I Soleus % type fiber IIA Soleus % type fiber other	57.5 39.9 2.3	37.7 51.9 9.6	19.8 -12 -7.3	Not mentioned	(C57BL/6J/129/Sv	MHC type I protein concentration in soleus, PGC-1α mRNA compared with the contralateral control TA muscle, running distance, myoglobin.	Muscle mass soleus, trend toward decreased cross-sectional area but the difference was not statistically significant.	Muscle mass in TA and plantaris, CaMKI, CaMKIIγ, and CaMKII.	CaMKIV is not expressed in skeletal muscle is valuable to understanding of our findings that Camk4 knockout mice are normal in muscle fiber type composition and with regard to activity-dependent changes in myofiber specialization.
Giannastasio et al., 2018	PMID: 30143714	Ccnd3	9230106B05Rik, AA682053, AL024085, AW146355, C78795	D3-/-	Cyclin D3	Global Knockout	Interbreeding heterozygous animals	Mices were housed cages at 22°C to 24°C with a 12-h dark-light cycle, and ad libitum access to food and water.	MHC analysis and Immunostaining	Fig. 4. A and B, Fig. 5 H	TA % myofiber type IIA TA % myofiber type IIB	11.36 35.61	4.26 45.29	7.1 -9.7	3 to 24 months old	Not mentioned	Energy expenditure in juvenile, lack of motor activity, run time, run distance juvenile, performance during a single bout of treadmill endurance-type exercise, NDHT staining, genes categorized as slow myofiber-specific.	Food intake, fat oxidation capacity, body weight, 655 genes.	Food efficiency ratio (FER).	Cyclin D3 inhibits, directly or indirectly, the MEF2 and/or NFAT transcriptional function with the involvement of the associated kinase activity
Hénique et al., 2015	PMID: 25713059	Cpt1a	C730027G07, CP, CPTI, Cpt, Cpt1 CPT1, CPT1-L, L-CPT1	Cpt1	Carnitine palmitoyltransferase 1	Conditional knockout	In vivo eletrotransfer	Mices were group-caged with a 12-h dark-light cycle, controlled temperature and humidity , and 4% fat irradiated chow diet	MHC Immunostaining	Fig. 3 C	TA % type fiber IIA (*)	52	42	11	2 or 20 old months	C57BL/6J	Oleate oxidation, TA weight, TA-to-body mass ratio, frequency of myofibers, SDH activity, higher capillary-tofiber density, glycogen content, fatigue resistance, gene expression of PPAR-b, PGC-1b,HIF-1a, and PECAM-1, MHCIIB in older.	Phosphorylated-GS/GS ratio, TA weight and SDH, MHCI and MHCIIa in older.	PGC-1a, Tfam, Cyt c, UCP2, NFAT, calcineurin mRNA, SIRT1, SIRT3, HIF-2a, VEGF-A, VEGF-B, and REDD1	Directly targeting muscle mFAO was sufficient to induce a muscle fiber type switch from glycolytic to oxidative and to increase vascularization, hence mimicking the exercise-induced oxidative phenotype and identifying muscle mFAO as a key player in skeletal muscle remodeling and/or plasticity.
Alexander et al., 2010	PMID: 19914232	FoxJ3	C330039G02Rik, Fhd6 FOXJ3	FoxJ3	Forkhead box J3	Global knockout	Foxj3-trapped ES cells were injected into blastocysts	Mices were housed cages with a 12-h dark-light cycle and kept on a 4% fat irradiated chow diet.	ATPase staining	Fig 5. B and C	EDL % type fiber I (*) Soleus % type fiber I (*)	0.2 44	3.7 62	-3.5 -18	4 to 6 months old	C56/B6J and 129p2 olahsd	Muscle regeneration, Proliferative capacity in G2/M, myoblast proliferation.	Proliferative capacity in G0/G1, Mef2c, Tnni1 and Tnnt2.	Myogenic progenitor cells, Ki67 expression, number of myogenic progenitor cells, cell death.	Foxj3 mutant mice demonstrate a phenotype consistent with decreased Mef2c expression and emphasize the role of Foxj3 in skeletal muscle biology including cell cycle kinetics, fiber type diversity and muscle regeneration.
Kamei et al., 2004	PMID: 15272020	Foxo1	AI876417, Afxh, FKHR, Fkhr1a, Foxo1 FKH1, FKHRA, FOXO1	Foxo1	Forkhead box O1	Global overexpression	Fertilized eggs were recovered from C57BL/6 females crossed with C57BL/6 males and microinjected with transgene	Mices were housed cages at 22°C with a 12-h dark-light cycle	ATPase staining	Fig 3. A (mouse A2 line)	Soleus number type fiber I (*) Soleus number type fiber II (*)	30 70	40 60	-10 10	3- 4 months old	C57BL/6	Expression gene for components of the mictochondrial electron transport system such as cytochrome c ocxidase II and IV, F0,F1-ATPase, PGC-1α mRNA levels.	Weight in females and males at 5 week age, stature, skeletal mass, expression gene related to structural proteins of the fiber type I, protein levels of tropinin I and myoglobin in type I fiber, reduction in the number of type I fibers.	Food intake per body weight, Blood metabolite and insulin levels, gene expression of type II fiber, levels of the other FOXO members.	The reduced skeletal muscle mass in FOXO1 mice may be caused by the suppression of IGF signaling during skeletal muscle formation, and FOXO1 may therefore be involved in age-related sarcopenia in humans.
Foster et al., 2012	PMID: 22246884	Mapk12	AW123708, Erk6, P38gamma, Prkm12, Sapk3 ERK-6, ERK3, ERK6, MAPK 12, P38GAMMA, PRKM12, SAPK-3, SAPK3	p38γ	Mitogen-activated protein kinase 12	Global knockout	p38γ−/− mice were generated via homologous recombination with LoxP	Not described	MHC Immunostaining	Fig 5. B and C	Soleus % type fiber I (*) Soleus % type fiber IIA (*)	52 45	39 64	15.7 -15.7	2 to 3 months old	C57BL6 and C57	IGF-1R	Soleus mass, Complete loss of P38gamma protein, myostatinm atrogin and Murf1.	Gastrocnemius mass, total soleus fiber number, total body weight, soleus mRNA levels for myoD or myf5, PPARα, PGC1α , Glut4, MCIP.	The establishment of the p38γ knockout mouse model will enable us to further investigate its role in muscle biology and diseases, and ultimately contributes to our better understanding of signal transduction in muscle development and regulation.
Hennebry et al., 2009	PMID: 19129464	Mstn	Cmpt, Gdf8 GDF8, MSLHP	Mstn	Myostatin	Global knockout (null mice)	Mice were obtained from Se-Jin Lee	All animals were housed under the same conditions with ad libitum access to food and water	MHC Immunostaining	Fig 1. and text	Biceps femoris % type fiber I (*) Biceps femoris % type fiber IIA (*) Biceps femoris % type fibers IIB/X (*) Tibialis anterior % type fiber IIA (*) Tibialis anterior % type fibers IIB/X(*)	0.4 1.1 99.5 1 99	1.1 5.7 93.2 6 94	-1.7 -4.6 6.5 -5 4.5	6 months old	C57BL/6	Glycolytic fibers in BF and TA, MyoD protein levels.	MEFC2 levels, expression of calcineurin in BF, MLC1f expression BF has lower resistance to fatigue protocol.	Rise time of single twitches.	Mstn may accomplish the alteration in fiber-type composition either during prenatal or postnatal myogenesis by controlling myoblast number and or regulation of MyoD and MEF2 gene expression.
Maccharia et al., 2010	PMID: 20544915	MyoD1	AI503393, MYF3, MyoD, Myod-1, bHLHc1 MYF3, MYOD, PUM, bHLHc1	MyoD	Myogenic differentiation 1	Global knockout	Knock out mice were bread in the animal facilities of the Royal Veterinary College.	Not mentined	MHC immunohistochemistry	Fig 2. A legend	EDL % Type fiber I	7.4	2.2	5.3	3 months old	BALB/c	Number of satellite cells un EDL.	Maximal tetanic tension evoked through nerve stimulation, proliferation dynamics.	Maximal tetanic tension, specific tension, functional contraction of the muscles during field stimulation, postsynaptic membrane surface, NMJs in EDL.	These results indicate that the lack of MyoD leads to a partial transformation of type IIA fibers to type I. This limited myofiber transformation was reflected by an apparent similarity in capillary densityIn this investigation we observed a relatively very low percentage change in type IIB fiber proportions in MyoD / muscle. Interestingly, we observed a conversion of a population of type IIX and…
Ehlers et al., 2014	PMID: 25242327	Nfatc1	2210017P03Rik, AI449492, AV076380, NF-A, NF-ATc, NFA, NFAT2, NFATc, Nfatcb NF-ATC, NF-ATc1.2, NFAT2, NFATc	NFATc1	Nuclear factor of activated T cells, cytoplasmic, calcineurin dependent 1	Conditional knockout	nfatc1+/Δ mice, male nfatc1flox/flox mice were crossed to female Mef2c-AHF-Cre mice	Not described	ATPase staining	Fig 2. C	Soleus number Type fiber I (*)	55	128	-1.9	42 days old	Not mentioned	Slow fiber after 7 days exercise, fast fiber genes in nfatc1SkMKO soleus and slow fiber gene expression at the transcript level after exercise.	Myod activity, myotube formation, myosin heavy chain expression, MyoD-dependent genes, slow fibers.	MyoD-dependent transactivation strongly repressed by NFATc1, growth, body mass, muscle weight, fiber type switching in response to exercise, time or distance run.	These studies establish a molecular mechanism for fiber type switching through direct inhibition of MyoD to control the opposing roles of MyoD and NFATc1 in fast versus slow fiber phenotypes
Mitchell et al., 2015	PMID: 25596718	Nol3	A, ARC, B430311C09Rik, MYC, NOP, No, Nop30 ARC, FCM, MYOCL1, MYP, NOP, NOP30	Arc	Nucleolar protein 3 (apoptosis repressor with CARD domain)	Global knockout	Disrupted ARC allele	Mices were housed cages at 20°C with a 12-h dark-light cycle, humidity ~50% and ad libitum access to food and water.	Immunofluorescence MHC	Fig 3. C and D, Text	Soleus % type fiber I Soleus % Type fiber IIA Plantaris % Type fiber IIA Plantaris % Type fiber IIB	29.8 55.9 19 57.2	32.8 51 28.1 45.2	-3.5 4.4 -9.4 13.4	18 weeks old	C57BL/6	SDH activity in the soleus, PFK activity in the plantaris, GPD staining in type IIA and IIB fibers of the soleus, SDH activity in type IIA fibers, GDP staining in type IIA and IIB fibers, MAFbx protein content in Soleus, increased LC3I protein, Soleus Bax protein, red muscle ratio BAX-Bcl-2.	FLIP(s) and Hsp70 proteins.	Body, heart, kidney, muscle weights, activity levels, daily VO2, food intake, the total fiber number (data not shown but cited), SDH activity in plantaris, soleus PFK activity, LC3I, LC3II, or p62 protein content, XIAP in the soleus, FLIP(s), HSP70 and XIAP in plantaris, Soleus and Plantaris Bcl-2 protein and ratio BAX:Bcl-2	The absence of ARC results in altered fiber type distribution, decreased muscle size, and reduced force generating capacity. Moreover, these changes appear to be muscle and/or fiber type dependent.
Lin et al., 2002	PMID: 12181572	Ppargc1a	A830037N07Rik, Gm11133, PGC-1, Ppargc-1-alpha, Pgc-1alpha, Pgc1, Pgco1, Ppargc1 LEM6, PGC-1(alpha), PGC-1alpha, PGC-1v, PGC1, PGC1A, PPARGC1	PGC-1α	Peroxisome Proliferator-Activated Receptor Gamma Coactivator 1-Alpha	Transgenic mice expressing PGC-1α under control of the MCK promoter	Standard DNA microinjection	Not described	ATPase staining	Fig 2. D	Plantaris number Type fiber I (*) Plantaris number Type fiber IIA (*) Plantaris number Type fiber IIB (*)	10 15 42	0.1 0.1 64	14.8 22.2 -37.0	3 months old	C57/BL6	COX II and COX IV, enzymes involved in electron transport, genes specifically enriched in type I fibres, such as myoglobin and troponin I, activity of the Mef2 mutant promoter, VO2max, speed at submaximal RER, Fabp3, FAT/CD36, Fatp1, Cpt1b, Mcad, Lcad, Acadvl, Cycs, Cox4, Uqcrb, Idh3a, Sod2, Txnrd2, Erra, Tfam, Pdk4 mRNA mDNA/gDNA, citrate synthase activity, glycogen stores in skeletal muscle.	Troponin I, weight, fatigue.	Glucose and insulin levels, glucose and insulin sensitivity, body weight and body composition, VO2, liver glycogen content.	Increase type I and type IIA in plantaris, a muscle group containing almost exclusively type IIb fibres in non-transgenic mice.
Yu et al., 2000	PMID: 10848522	Thra	6430529J03Rik, AW259572, Erba, Nr1a1, Rvr, T3R[a], T3Ralpha1, Thra2, c-erbA-1, c-erbA-alpha, c-erbAalpha, Thra AR7, CHNG6, EAR7, ERB-T-1, ERBA, ERBA1, NR1A11, THRA2, TRalpha, c-ERBA-1, THRA	TR-α1	Thyroid hormone receptor alpha	Global knockout	Disrupting gene	Mices were housed cages in 12-h dark-light cycle	ATPase staining in soleus and EDL, measured type I and IIA in soleus and Iib and intermediate in EDL	Table 3 and 4	Soleus % Type I Soleus % Type IIA	59.7 37.6	38.9 59.6	20.8 -22.0	2-6 month old	BALB/c	Type I MHC in TR-α1.			The TR-α1 and TR-β appear to be able to, at least in part, functionally substitute for or cooperate with each other.
		Thrb	Nr, Nr1a2, T3R[b, T3R[b], T3Rbe, T3Rbeta1, Thrb2, c-erbAb, c-erbAbeta, Thrb C-ERBA-2, C-ERBA-BETA, ERBA2, GRTH, NR1A2, PRTH, THR11, THRB2, TRbeta, THRB	TR-β	Thyroid hormone receptor beta						Soleus % Type I Soleus % Type IIA	31.9 65.5	34.9 63.7	-2.7 2.5	2-6 month old	C57BL/6J mice	Body weight.		Type I MHC in TR-β.
Rasbach et al., 2010	PMID: 21106753	Epas1	HIF-2alpha, HIF2A, HLF, HRF, MOP2, bHLHe73 ECYT4, HIF2A, HLF, MOP2, PASD2, bHLHe73	Hif2a	Endothelial PAS domain protein 1 (also known as hypoxia-inducible factor-2alpha)	Conditional Knockout	Crossing mice with a floxed allele with animals transgenically expessing Cre-recombinase	Mices were housed individually	MHC analysis	Fig 5. B and C	Soleus number type fiber I (*) Soleus number type fibre IIB (*) Soleus relative expession MHC I (*) Soleus relative expession MHC IIB (*)	12 27 0.58 1.77	49 1.7 1.05 0.9	-36.7 28.2 -13.0 17.9	12 to 14 weeks old	C57/BL6	IN PGC1α/HIF2α: ERRα and PPARα, MyoVIIa, mRNA levels of MyoHCI, Myoglobin, Calmodulin2, and Troponin I.	IN PGC1α/HIF2α: MyoIV, MyoHCIIb, MyoHCIIa.	IN PGC1α/HIF2α: HIF1α, HIF2α protein under normoxic conditions, MyoHCIIX.	Robust regulation of HIF2α by PGC1α is at least partially muscle-cell selective.HIF2α is a potential regulator of slow fiber-type determination, by increasing the slow twitch myosin heavy chain muscle program and suppressing the expression of fast twitch markers.
Rangwala et al., 2010	PMID: 20418374	Esrrg	ER, ERR3, Errg, NR3, NR3B3, mKIAA0832 ERR-gamma, ERR3, ERRg, ERRgamma, NR3B3	ERRγ	Estrogen-related receptor gamma	Conditional overexpression	Null mice were backcrossed to C57Bl/6 for four generations	Mices were housed cages with a 12-h dark-light cycle	MHC gene expression analysis	Fig 3. E	Gastrocnemius Relative expression MHC IIA (*) Gastrocnemius Relative expression MHC IIB (*)	2.8 0.6	1 1	9.6 -15.4	4 months old	C57Bl/6	Epas, Cpt1b and Fabp3 in myotubes, Oxidative phosphorilation mildly up-regulated. Mitochondrial function in primary mouse myotubes, mitochondrial levels.	ERRα and PGC-1α in myotubes, tibialis anterior and gastrocnemios muscle, muscle weight of glycolytic and mixed fiver muscle, respiratory exchange ratio, peak oxidative capacity.	Same colour in hind limb muscle, body weight, body composition, energy expenditure, respiratory ratios in basal state.	The expression of ERRγ transcript was found to correlate with the oxidative potential of skeletal muscle; it is expressed at high levels in the soleus (type I, oxidative muscle) and at low levels in the gastrocnemius (type I and II mixed fiber muscle) and extensor digitorum longus (type II, glycolytic muscle).
Quinn et al., 2013	PMID: 23161867	Il15	AI503618, Il-15 IL-15	Il-15	Interleukin 15	Conditional overexpression	Mating heterozygous IL-15 Tg males with commercially purchased C57BL/6J females	Mices were housed cages in 12-h dark-light cycle, and ad libitum access to food and water.	MHC gene expression analysis	Fig 5. C, D and E	Soleus abundance expression MHC-I (*) Soleus abundance expression MHC-IIA (*) Soleus abundance expression MHC-IIX (*) EDL abundance expression MHC-I (*) EDL abundance expression MHC-IIX (*) Gastrocnemius abundance expression MHC-I (*)	341 104 32 9 90 13	163 200 42 1 36 1	31.2 -27.6 -3.7 3.3 13.7 19.5	4 months old	C57BL/6J+S25:T33	Body mass, lean body mass, total body fat, and percent body fat, Time to exhaustion, Total and ambulatory activity levels, Energy expenditure, Oxidative metabolism, Sirt1, Ppard, Ppargc1b, Cpt1b, Ucp2 mRNA in EDL, Ppard, Ppargc1a, Pdk4 mRNA in liver, Sirt1 protein in soleus, Sirt1, Ppard, Ppargc1a, Ppargc1b protein in EDL nd Mhc1 mRNA in soleus, EDL and gastrocnemius, Mhc2x mRNA in EDL, Troponin …	Retroperitoneal fat pad mass, EDL muscle mass, Gastrocnemius muscle mass RER, Ppargc1a, Ppargc1b, Pdk4 mRNA in white adipose tissue, Tnni2 (or Tnnt3) mRNA, Mhc2a, Mhc2x mRNA in soleus.	Intrascapular brown adipose tissue, Soleus muscle weight, food intake, Max run speed, Sirt1, Ppargc1b mRNA in soleus, liver, brown fat or retroperitoneal fat, Ppargc1a, Pdk4 mRNA in muscle, Ppargc1a protein in soleus, Brown adipose tissue biosynthesis, Sirt1, Pparg, Ppargc1a, Ppargc1b in brown adipose tissue, Mhc2b mRNA in soleus, Mitochondrial DNA, IL15α.	The association of IL-15 with exercise and a prooxidative metabolic profile suggests IL-15 or an IL-15 derivative could be explored as a possible pharmacological exercise mimetic.
Yamamoto et al., 2011	PMID: 22078881	Ncor1	5730405M06Rik, A230020K14Rik, N-Cor, Rip13, Rxrip13, mKIAA1047 N-CoR, N-CoR1, PPP1R109, TRAC1, hN-CoR	NcoR1	Nuclear receptor corepressor 1	Conditional knockout	Electroporation and blastocyst injection (Suppl. Material - pag 5)	Mices were housed cages at 23°C with a 12-h dark-light cycle, and free access to food and water (Suppl. Material - pag 5)	MHC gene expression analysis	Fig 3. D	Gastrocnemius relative expression MyHC IIA (*) Gastrocnemius relative expression MyHC IIX (*) Quadriceps relative expression MyHC I (*) Quadriceps relative expression MyHC IIA (*) Quadriceps relative expression MyHC IIX (*)	1.3 1.5 1.4 1.2 1	1 1 0.9 0.9 0.7	2.3 6.1 6.1 1.7 2.8	14 to 28 weeks	C57BL/6J and C3H/HeJ	Soleus relative mass, total locomotor activity, O2 consumption, cold tolerance, distance and time run, endurance perform, oxidative capacity, SDH and COX staining.	LDL, HDL and total cholesterol, glucose (trend, not significant), RER on high fat diet, Connective tissue, MyHC IIB fibers.	Body weight, food intake, respiratory exchange ratio on a high fat diet, heart rate, blood pressure, cardiac morphology, Hif1a, Glut1, Fgfr2, Ppard, Err mRNA, Myod, Myf5, Myog mRNA.	Knockout mouses also showed an increase in muscle mass.
Arany et al., 2007	PMID: 17189205	Ppargc1b	4631412G21Rik, PGC-1beta, PGC-1beta/ERRL1, PPARGC-1-beta, Perc ERRL1, PERC, PGC-1(beta), PGC1B	PGC-1β	Peroxisome proliferative activated receptor, gamma, coactivator 1 beta	Condicional overexpression	Mouse oocytes were injected with the construct cDNA, mouse line T37	Mices were housed cages in 12-h dark-light cycle, and standard rodent chow diet.	MHC gene expression analysis	Fig 3. A	Gastrocnemius relative expression MHC I (*) Gastrocnemius relative expression MHC IIX (*) Gastrocnemius relative expression MHC IIB (*) EDL relative expression MHC I (*) EDL relative expression MHC IIA (*) EDL relative expression MHC IIX (*) EDL relative expression MHC IIB (*) TA relative expression MHC IIA (*) TA relative expression MHC IIX (*) TA relative expression MHC IIB (*)	0.3 4.5 0.3 0.1 0.3 1.7 0.4 0.6 2.2 0.5	1 1.1 1 1 1 1 0.9 1 1 1	-19.2 50.8 -19.2 -21.6 -13.6 42.4 -7.1 -10.9 25.7 -13.2	3-5 months old	FVB mice and C57BL/6	Performed work, Every fiber in TA is oxidative MHCIIX, Cycs, Nduf5, Atp5o, Cox5b, Cd36, Mcad, Cpt1 mRNA, ERRα and PPARα, distance run.			The transgenic mice show both an increase in the expression of type IIX MHC and a large increase in mitochondrial content. Furthermore, the expression of transgenic PGC-1b actually suppresses the expression of MHC I and IIA
Lin et al., 2014	PMID: 24454908	Sirt3	2310003L23Rik, AI848213, Sir2l3 SIR2L3	Sirt3	Sirtuin 3	Skeletal muscle-specific SIRT3 transgenic mice	Transgene construct was injected into fertilized C57BL/6 mouse oocytes. SIRT3 short form	Mices were housed cages at 23°C with a 12-h dark-light cycle, and free access to food and water.	MHC protein levels by Western blot	Fig 4. A	Quadriceps relative expression MHC I (*) Quadriceps relative expression MHC IIB (*)	36 0.07	2 1	49.3 -24.8	3 to 8 months old	C57BL/6	Spontaneous physical activity, female energy expenditure, exhaustion time, distance run, oxygen consume, oxidative capacity, phosphorylated AMPK anda ACC, PPARγ and PPARδ in gastrocnemius, PPARδ in EDL, citrate synthase levels, mitochondria proteins (mg), FOXO1 protein level.	Respiratory exchange rate, muscle strength, EDL, TA. Gastrocnemius muscle weight, muscle size, phosphorylated FOXO1.	Body weight, food intake, male energy expenditure, IP-GTT, OGTT, total AMPK protein, PGC-1α and PGC-1β, mitochondrial oxygen consumption, linear growth, weight of soleus, heart, liver, and white and brown adipose tissues.	Overexpression SIRT3 in skeletal muscle drives the switch of muscle fiber types, mainly through the activation of AMPK and PPARδ.
An et al., 2014	PMID: 24740654	Trib3	Ifld2, Nipk, SINK, SKIP3, TRB-3, Trb3 C20orf97, NIPK, SINK, SKIP3, TRB3	Trb3	Tribbles pseudokinase 3 (Tribbles Homolog 3 (Drosophila))	Conditional overexpression	Skeletal muscle actin (Smactin) promoter	Mices were housed cages in 12-h dark-light cycle, and standard rodent chow diet.	Electrophoretic separation of MHC	Fig 4. B and C	Soleus fractional expression MHC I (*) Soleus fractional expression MHC IIB (*) TA fractional expression MHC IIB (*)	35 6 65	12 36 85	23 -30.0 -20.0	10 weeks old	C57BL/6	TRB3 expression with exercise training, weights of the soleus and gastrocnemius, exercise capacity, liver and muscle glycogen concentrations but not significant, miR208b and miR499 microRNAs in skeletal muscle.	Basal rates of fatty acid oxidation.	Body weights, insulin signaling, skeletal muscle glucose uptake in response, whole body glucose homeostasis, contraction-stimulated glucose transport in TA muscle or SOL, PGC1α, citrate synthase, COX IV.	Muscle fiber-type switch from fast to slow observed in TRB3 TG mice contributes to improved exercise capacity.
Honda et al., 2017	PMID: 28769032	Vgll2	C130057C21Rik, VITO-1, Vito1, vgl-2 VGL2, VITO1	Vgll2	Vestigial like family member 2	Global Knockout	Targeted replacement of the Vgll2 loci by the lacZ gene in D3 ES cells. Mice were bread C57BL/6J mice for two generations	Not described	qPCR MHC analysis	Fig 3. A	Soleus number type fiber IIA(*) Soleus number type fibre IIB (*) Soleus Relative expression Myh7 (I) (*) Soleus Relative expression Myh2 (IIA) (*) Soleus Relative expression Myh1 (IIX) (*) Soleus Relative expression Myh4 (IIB) (*)	1.16 58.52 0.4 0.1 2.3 8.6	17.7 40.2 0.7 0.7 0.7 0.7	-16.0 16.8 -21.4 -24.3 9.4 36.3	12 week old	C57BL/6 J mice	Vgll2 mRNA in the Type I and IIa fiber-enriched slow soleus muscle than in the Type IIb fiber-enriched fast gastrocnemius and extensor digitorum longus (EDL), SOX6, Sp3.	Soleus type I and type IIa fibers, running distance and velocity, PURβ.	Grip strenght, expression levels of other TEAD cofactors such as Yap and Taz.	The findings suggested the direct and indirect involvement of the Vgll2-TEAD1 complex in the regulatory program for slow skeletal muscle gene expression.
Rao et al., 2019	PMID: 30746755	Akirin-1	6330407G11Rik C1orf108, STRF2	Aki1	Akirin 1	Global knockout	Infection with floxed genomic fragment (detailed procedure of the global Akirin1 knockout mouse generation was obtained from Goto et al., 2008)	Mices were housed cages at 20°C with a 12-h dark-light cycle, and ad libitum access to food and water.	MHC analysis	Fig. 7. A ii, B, C and D	Quadriceps myofiber number Type I (*) Quadriceps myofiber number Type IIA (*) Quadriceps fold change Myh7 I (*) Quadriceps fold change Myh2 IIA (*)	99 470 0.6 1.8	169 330 0.9 0.9	-5.2 7.7 -14.6 22.9	Not mentioned	C57BL/6 and SV129	Phospho‐FoxO3 protein (inactive form), MyHC type IIA.	MuRF‐1protein, total FoxO3 protein, phospho‐CREB1 (ser133) (active form) and total CREB‐1 protein levels, MyHC type I, SDH staining, mtDNA per nuDNA ratio, Protein levels of AMPKα, PPARα and PGC1α.	Body size, skeletal, muscle mass, or individual muscle weight in mice, level of atrogin1, MyHC type IIb, α‐GPD, AMPKα2 mRNA, mRNA levels of PPARα and PGC1α genes.	Akirin1 might be presumably influencing the metabolic activity of the skeletal muscle although via indirect pathways which needs to be further demarcated.
Chalkiadaki et al., 2014	PMID: 25032964	Sirt1	AA673258, SIR2L1, Sir2, Sir2a, Sir2alpha SIR2, SIR2L1, SIR2alpha	Sirt1	Sirtuin 1	Conditional overexpression	Injecting oocytes under the control of MCK and generated by crossing mice being homozygous for the floxed SIRT1 allele	Mices were housed cages in 12-h dark-light cycle, and standard rodent chow diet.	ATPase staining and PCR MHC analysis	Fig 3. B and Fig S2.C	Gastrocnemius % Type I (*) - pH 10.2 and 4.31 Gastrocnemius % Type II (*) - pH 10.2 and 4.31 Gastrocnemius relative expression MHC IIA (*) Gastrocnemius relative expression MHC IIX (*) Gastrocnemius relative expression MHC IIB (*)	8 91 4.6 7.1 0.3	5.9 94 1 1.3 1	1.7 -1.3 3.3 5.4 -19.3	8-10 weeks old	C57BL/6	IN OVEREXPRESSION MICE: MAFBx and MuRF1 in atrophy conditions, ATPase in Gastrocnemius type I, PGC-1α, TFAM, and PPARα, Cytochrome C, Mtor. IN KO MICE: Blood glucose, exhausted faster.	IN OVEREXPRESSION MICE:Muscle/body weight, CSA gastrocnemius, E3 ubiquitin, MAFBx and MuRF1. IN KO MICE: EYC genes.	IN OVEREXPRESSION MICE: FOXO1. IN KO MICE: Insulin, troponin isoforms, MyHC and mitochondrial transcription factors, MAFBx and MuRF1.	Overexpression of SIRT1 in skeletal muscle drives the formation of more oxidative fibers. In summary, deletion of SIRT1 in muscle exerts only a subtle phenotype under the conditions tested. SIRT1 overexpression results in a fast-to-slow fiber type switch that translates into an increase in oxidative fibers
Table S2. Information about the muscle fibre genes identified in this systematic review

## Sheet: S3 GWAS associations
Associations for Bdkrb2
Variant and risk allele	Reported trait	P-value	P-value annotation	RAF	Beta	CI	Mapped gene	Trait(s)	Study accession	Location
rs4384548-A	Subcutaneous adipose tissue	5 x 10-8	(women)	0.02	232.19 unit increase	[NR]	C14orf132, BDKRB2	subcutaneous adipose tissue measurement	GCST003170	14:96178806
rs11160318-G	Mumps	5 x 10-12		0.68	-	[1.08-1.11]	BDKRB2, C14orf132	susceptibility to mumps measurement	GCST005003	14:96193582
rs56274409-A	Corneal astigmatism	7 x 10-6		0.944	0.028 dioptres decrease	[0.016-0.04]	BDKRB2, AL355102.2	Corneal astigmatism	GCST007159	14:96224491
rs76881547-T	Cerebrospinal fluid AB1-42 levels	5 x 10-6		0.091	0.033 unit decrease	[0.019-0.047]	C14orf132, BDKRB2	beta-amyloid 1-42 measurement	GCST004069	14:96166655
rs7158214-?	Coronary artery calcified atherosclerotic plaque (90 or 130 HU threshold) in type 2 diabetes	4 x 10-6		NR	0.133 unit increase	[0.06-0.206]	BDKRB2, C14orf132	coronary artery calcification, type II diabetes mellitus	GCST005175	14:96176310
Associations for Bdnf
Variant and risk allele	Reported trait	P-value	P-value annotation	RAF	Beta	CI	Mapped gene	Trait(s)	Study accession	Location
rs7103411-T	Body mass index	2 x 10-22		0.7825	0.0419 kg/m2 increase	[0.033-0.05]	BDNF-AS, BDNF	physical activity measurement, body mass index	GCST004557	11:27678578
rs11030099-A	Hemoglobin	1 x 10-9		0.198944	0.01698022 unit increase	[0.012-0.022]	BDNF, BDNF-AS	hemoglobin measurement	GCST90002384	11:27656036
rs10767659-G	Type 2 diabetes	5 x 10-10		0.3538	0.026 unit increase	[0.018-0.034]	BDNF, BDNF-AS	type II diabetes mellitus	GCST010557	11:27664649
rs6265-C	C-reactive protein levels	8 x 10-19		0.811757	0.0227799 unit increase	[0.018-0.028]	BDNF, BDNF-AS	C-reactive protein measurement	GCST009777	11:27658369
rs11030119-?	Fat-free mass	1 x 10-15		NR	0.19052 unit increase	[0.14-0.24]	AC103796.1, BDNF	lean body mass	GCST007063	11:27706555
Associations for Camk4
Variant and risk allele	Reported trait	P-value	P-value annotation	RAF	Beta	CI	Mapped gene	Trait(s)	Study accession	Location
rs7714962-?	Asthma (childhood onset)	6 x 10-9		NR	'-	'-	CAMK4	childhood onset asthma	GCST009841	5:111223856
rs1457115-?	Atopic asthma	5 x 10-13		NR	'-	'-	CAMK4	atopic asthma	GCST009850	5:111231900
rs114378220-T	Autoimmune thyroid disease	3 x 10-11		0.071	'-	[NR]	CAMK4	autoimmune thyroid disease	GCST010571	5:111230662
rs114378220-T	Lymphocyte counts	9 x 10-24		0.073614	0.038012 SD unit decrease	[0.031-0.045]	CAMK4	lymphocyte count	GCST90002316	5:111230662
rs33966734-?	Fat-free mass	2 x 10-16		NR	0.78321 unit decrease	[0.6-0.97]	CCND3	lean body mass	GCST007063	6:41936060
Associations for Ccnd3
Variant and risk allele	Reported trait	P-value	P-value annotation	RAF	Beta	CI	Mapped gene	Trait(s)	Study accession	Location
rs10947997-T	Red blood cell count	1 x 10-58		0.1771	0.07501178 unit decrease	[0.066-0.084]	CCND3	erythrocyte count	GCST004601	6:41953503
rs33966734-?	Fat-free mass	4 x 10-10	(male)	NR	0.94508 unit decrease	[0.65-1.24]	CCND3	lean body mass	GCST007063	6:41936060
rs7750688-C	HDL cholesterol levels	4 x 10-22		0.243395	0.0214656 unit decrease	[0.017-0.026]	CCND3	high density lipoprotein cholesterol measurement	GCST010242	6:42024002
rs9349205-?	Mean corpuscular hemoglobin	1 x 10-8		NR	'-	'-	CCND3	mean corpuscular hemoglobin	GCST004006	6:41957421
rs144387335-A	Granulocyte percentage of myeloid white cells	2 x 10-27		0.2536	0.04470637 unit decrease	[0.037-0.053]	CCND3	granulocyte percentage of myeloid white cells	GCST004608	6:42010872
Associations for Cpt1a
Variant and risk allele	Reported trait	P-value	P-value annotation	RAF	Beta	CI	Mapped gene	Trait(s)	Study accession	Location
rs11228377-T	Triglyceride levels	3 x 10-14		0.405978	0.0154093 unit increase	[0.011-0.019]	CPT1A	triglyceride measurement	GCST010244	11:68835878
rs17610395-?	Serum metabolite levels	5 x 10-8	(FAw3)	NR	0.068737514 unit decrease	NR	CPT1A	serum metabolite measurement	GCST009242	11:68794860
rs7938117-?	Lipid traits (pleiotropy) (HIPO component 1)	3 x 10-11		NR	'-	'-	CPT1A	total cholesterol measurement, triglyceride measurement, low density lipoprotein cholesterol measurement, high density lipoprotein cholesterol measurement	GCST006666	11:68830586
rs78863347-T	Urate levels	4 x 10-12	(East Asian)	0.9637	0.1318 mg/dL increase	[0.095-0.169]	CPT1A	urate measurement	GCST008972	11:68824581
rs11605837-G	Apolipoprotein A1 levels	1 x 10-13		0.685032	0.0157002 unit increase	[0.012-0.02]	CPT1A	apolipoprotein A 1 measurement	GCST010241	11:68830418
Associations for Foxj3
Variant and risk allele	Reported trait	P-value	P-value annotation	RAF	Beta	CI	Mapped gene	Trait(s)	Study accession	Location
rs35011283-?	Menarche (age at onset)	2 x 10-8		NR	'-	'-	FOXJ3	age at menarche	GCST007078	1:42300612
Associations for Foxo1
Variant and risk allele	Reported trait	P-value	P-value annotation	RAF	Beta	CI	Mapped gene	Trait(s)	Study accession	Location
rs113377887-T	Hay fever and/or eczema	2 x 10-12		0.2107	'-	[1.038-1.067]	FOXO1	Eczema, allergic rhinitis	GCST009717	13:40629228
rs76983463-?	Heel bone mineral density	7 x 10-16		NR	'-	'-	FOXO1	heel bone mineral density	GCST007066	13:40621517
rs71718386-C	Eosinophil counts	1 x 10-13		0.3076	0.02871437 unit increase	[0.021-0.036]	FOXO1	eosinophil count	GCST004606	13:40650151
rs4325427-T	Monocyte percentage of white cells	1 x 10-16		0.2868	0.03253815 unit decrease	[0.025-0.04]	FOXO1	monocyte percentage of leukocytes	GCST004609	13:40642397
rs4325427-T	Granulocyte percentage of myeloid white cells	3 x 10-20		0.2868	0.03641795 unit increase	[0.029-0.044]	FOXO1	granulocyte percentage of myeloid white cells	GCST004608	13:40642397
Associations for Mapk12
Variant and risk allele	Reported trait	P-value	P-value annotation	RAF	Beta	CI	Mapped gene	Trait(s)	Study accession	Location
rs2066773-A	Triiodothyronine levels and thyroxine levels	1 x 10-6		0.02	0.029 unit increase	[0.017-0.041]	MAPK12	thyroxine measurement, triiodothyronine measurement	GCST007680	22:50257071
rs742184-T	Diverticular disease	8 x 10-7		0.282356176358287	0.0029374 unit decrease	[NR]	MAPK12	diverticular disease	GCST006479	22:50258690
rs61748567-A	Urinary metabolite levels in chronic kidney disease	1 x 10-24	(diacetylspermidine)	0.02	0.894 unit increase	[0.72-1.06]	HDAC10, MAPK12	chronic kidney disease, urinary metabolite measurement	GCST009733	22:50246903
Association for Mstn
No data available
Association for Myod1
No data available
Association for Nfatc1
Variant and risk allele	Reported trait	P-value	P-value annotation	RAF	Beta	CI	Mapped gene	Trait(s)	Study accession	Location
rs8090312-?	Height	4 x 10-9		NR	0.017206382 unit decrease	[0.011-0.023]	NFATC1	body height	GCST008839	18:79465154
rs78015143-G	Heel bone mineral density	2 x 10-11		0.901893	0.0365443 unit decrease	[0.025-0.048]	NFATC1	heel bone mineral density	GCST006288	18:79488691
rs12327286-?	Metabolite levels	9 x 10-6	(TAG 46:1)	NR	0.19518033 unit decrease	[0.11-0.28]	NFATC1	triacylglycerol 46:1 measurement	GCST009391	18:79562146
rs9958919-?	Waist circumference adjusted for body mass index	2 x 10-16		NR	-	-	NFATC1	BMI-adjusted waist circumference	GCST009867	18:79464192
rs160189-G	Mean platelet volume	8 x 10-15		0.3158	0.03051198 unit decrease	[0.023-0.038]	NFATC1	mean platelet volume	GCST004599	18:79472709
Association for Nol3
No data available
Association for Ppargc1a
Variant and risk allele	Reported trait	P-value	P-value annotation	RAF	Beta	CI	Mapped gene	Trait(s)	Study accession	Location
rs768695-?	Reaction time	6 x 10-6		NR	0.0078592 unit decrease	[0.0044-0.0113]	PPARGC1A	reaction time measurement	GCST006268	4:23797195
rs2970854-G	PR interval	5 x 10-15		0.2608	0.5675 ms increase	[0.43-0.71]	PPARGC1A	PR interval	GCST010321	4:23825335
rs2970876-G	Hematocrit	1 x 10-10		0.490201	0.014310029 unit decrease	[0.01-0.0187]	PPARGC1A	hematocrit	GCST90002383	4:23886996
rs2970871-T	Sex hormone-binding globulin levels adjusted for BMI	3 x 10-8		0.441213	0.00731296 unit increase	[0.0049-0.0098]	PPARGC1A	sex hormone-binding globulin measurement	GCST90012106	4:23888959
rs7667050-T	Estimated glomerular filtration rate	3 x 10-14		0.471	0.002 unit increase	[0.0014-0.0026]	PPARGC1A	glomerular filtration rate	GCST008059	4:23811486
Associations for Thra
Variant and risk allele	Reported trait	P-value	P-value annotation	RAF	Beta	CI	Mapped gene	Trait(s)	Study accession	Location
rs939348-?	Asthma (childhood onset)	3 x 10-11		NR	'-	'-	THRA	childhood onset asthma	GCST009841	17:40075600
rs200282774-GC	Interleukin-8 levels	4 x 10-6		'-	0.1517 SD units decrease	[0.087-0.216]	THRA	interleukin-8 measurement	GCST004445	17:40082758
rs2230701-C	Body mass index	2 x 10-7		NR	0.036 unit increase	[NR]	THRA	body mass index	GCST006368	17:40083963
rs62065216-A	Chronic obstructive pulmonary disease	8 x 10-9		0.42	'-	[1.04-1.08]	THRA	chronic obstructive pulmonary disease	GCST007692	17:40062520
rs7502233-?	Red cell distribution width	8 x 10-8		NR	'-	'-	THRA	red blood cell distribution width	GCST007074	17:40062551
Associations for Thrb
Variant and risk allele	Reported trait	P-value	P-value annotation	RAF	Beta	CI	Mapped gene	Trait(s)	Study accession	Location
rs113700287-TTTTG	Red blood cell count	2 x 10-30		0.6712	0.04382223 unit decrease	[0.036-0.051]	THRB	erythrocyte count	GCST004601	3:24293021
rs145425144-?	Rubella	7 x 10-6		NR	0.1072 unit decrease	[0.061-0.154]	THRB	susceptibility to rubella infection measurement	GCST005020	3:24375403
rs6792725-A	Triglycerides	4 x 10-8		NR	0.018 unit increase	'-	THRB	triglyceride measurement	GCST007133	3:24478792
rs1667747-G	Heel bone mineral density	2 x 10-9		0.238183	0.0130243 unit increase	[0.0088-0.0173]	THRB	heel bone mineral density	GCST006979	3:24258120
rs6792725-A	Triglyceride levels	4 x 10-12		0.307593	0.0154612 unit increase	[0.011-0.02]	THRB	triglyceride measurement	GCST010244	3:24478792
Associations for Esrrg
Variant and risk allele	Reported trait	P-value	P-value annotation	RAF	Beta	CI	Mapped gene	Trait(s)	Study accession	Location
rs79131758-C	Post bronchodilator FEV1	8 x 10-7	(AA)	0.998	1.231 unit increase	NR	ESRRG	forced expiratory volume, response to bronchodilator	GCST003262	1:216796235
rs61818594-A	Weight	4 x 10-6		0.981	0.1243 unit increase	[0.071-0.177]	ESRRG	body weight	GCST008152	1:216948171
rs11585774-?	Refractive error	3 x 10-8		'-	'-	'-	ESRRG	Abnormality of refraction	GCST010002	1:217049073
rs2066108-A	General risk tolerance (MTAG)	2 x 10-9		0.167	0.0095 unit increase	[0.0064-0.0126]	ESRRG	risk-taking behaviour	GCST007325	1:216704150
rs12757183-T	Smoking status (ever vs never smokers)	2 x 10-8		0.8017	0.0140546365 unit increase	[0.0091-0.019]	ESRRG	smoking behavior	GCST007327	1:216747031
Associations for Il15
Variant and risk allele	Reported trait	P-value	P-value annotation	RAF	Beta	CI	Mapped gene	Trait(s)	Study accession	Location
rs4956410-A	Aspartate aminotransferase levels in non-alcoholic fatty liver disease	8 x 10-6		0.0744879	0.34206 unit decrease	[0.19-0.49]	INPP4B, IL15	aspartate aminotransferase measurement, non-alcoholic fatty liver disease	GCST008467	4:141766642
rs12647166-?	Neck circumference	3 x 10-7		NR	0.2844 unit increase	NR	INPP4B, IL15	neck circumference	GCST90017134	4:141839779
rs9990563-?	Metabolite levels	1 x 10-6	(pyridoxate)	NR	0.26311988 unit decrease	[0.16-0.37]	INPP4B, IL15	pyridoxate measurement	GCST009391	4:141754259
rs6819637-? x rs7691866-?	Neurofibrillary tangles (SNP x SNP interaction)	2 x 10-13		NR	'-	'-	AC021192.2 - AC079160.1 x IL15 - INPP4B	neurofibrillary tangles measurement	GCST010343	4:83766840|4:141807243
rs34465541-C	Post-traumatic stress disorder symptoms in trauma-exposed soldiers	3 x 10-8		0.07	'-	NR	IL15, INPP4B	response to trauma exposure, post-traumatic stress disorder symptom measurement	GCST008270	4:141865374
Associations for Ncor1
Variant and risk allele	Reported trait	P-value	P-value annotation	RAF	Beta	CI	Mapped gene	Trait(s)	Study accession	Location
rs8080378-G	Lymphocyte counts	4 x 10-14		0.531507	0.01711989 unit increase	[0.013-0.022]	NCOR1	lymphocyte count	GCST90002388	17:16095523
rs178810-T	C-reactive protein levels	3 x 10-8		0.56	0.02 unit increase	[0.012-0.028]	NCOR1	C-reactive protein measurement	GCST007614	17:16194116
rs12937088-G	Sex hormone-binding globulin levels adjusted for BMI	9 x 10-17		0.5079670000000001	0.00631421 unit increase	[0.0047-0.0079]	NCOR1	sex hormone-binding globulin measurement	GCST90012110	17:16127715
rs8080378-G	Monocyte count	4 x 10-14		0.531507	0.01711989 unit increase	[0.013-0.022]	NCOR1	monocyte count	GCST90002393	17:16095523
rs34351630-T	Lung function (FVC)	3 x 10-10		0.4654	0.0147 unit increase	[0.01-0.019]	NCOR1	vital capacity	GCST007429	17:16127206
Associations for Ppargc1b
Variant and risk allele	Reported trait	P-value	P-value annotation	RAF	Beta	CI	Mapped gene	Trait(s)	Study accession	Location
rs32578-G	HDL cholesterol levels	1 x 10-10		0.690984	0.0133241 unit decrease	[0.0093-0.0174]	PPARGC1B	high density lipoprotein cholesterol measurement	GCST010242	5:149832305
rs32578-G	Apolipoprotein A1 levels	6 x 10-9		0.691042	0.0123744 unit decrease	[0.0082-0.0165]	PPARGC1B	apolipoprotein A 1 measurement	GCST010241	5:149832305
rs32578-G	Nevus count or cutaneous melanoma	5 x 10-21		0.658392	'-	'-	PPARGC1B	nevus count, cutaneous melanoma	GCST010303	5:149832305
rs32578-G	Cutaneous malignant melanoma	7 x 10-17		0.6584	'-	NR	PPARGC1B	cutaneous melanoma	GCST010304	5:149832305
rs78814834-T	Nontraumatic osteonecrosis of the femoral head	1 x 10-6		0.042	'-	[1.87-4.38]	PPARGC1B	idiopathic osteonecrosis of the femoral head	GCST011155	5:149811984
Associatios for Sirt3
Variant and risk allele	Reported trait	P-value	P-value annotation	RAF	Beta	CI	Mapped gene	Trait(s)	Study accession	Location
rs73392700-?	Coronary artery disease	3 x 10-11		NR	0.0636127 unit increase	[0.045-0.082]	SIRT3	coronary artery disease	GCST010866	11:224845
rs7104764-G	Menarche (age at onset)	4 x 10-8		0.25	0.03 unit increase	[0.018-0.042]	SIRT3	age at menarche	GCST002541	11:229977
rs12226402-A	Cerebral aneurysm	2 x 10-12		0.126492689	'-	[1.234301783-1.45068935]	SIRT3	brain aneurysm	GCST90013685	11:215904
rs12226697-A	Mean corpuscular hemoglobin	2 x 10-10		0.0600632	'-	'-	SIRT3	mean corpuscular hemoglobin concentration	GCST90002326	11:216056
rs507139-G	Uterine fibroids	3 x 10-16		0.91118	'-	[1.16-1.27]	SIRT3	uterine fibroid	GCST006462	11:225196
Associations for Trib3
Variant and risk allele	Reported trait	P-value	P-value annotation	RAF	Beta	CI	Mapped gene	Trait(s)	Study accession	Location
rs9941733-G	Interleukin-4 levels	7 x 10-7		'-	0.114 SD units decrease	[0.069-0.159]	TRIB3	interleukin 4 measurement	GCST004453	20:393417
rs62191444-G	Interleukin-17 levels	4 x 10-6		'-	0.1136 SD units increase	[0.065-0.162]	TRIB3	interleukin 17 measurement	GCST004442	20:393023
rs9941733-G	Platelet-derived growth factor BB levels	3 x 10-7		'-	0.1161 SD units decrease	[0.071-0.161]	TRIB3	platelet-derived growth factor BB measurement	GCST004432	20:393417
rs6051520-T	Information processing speed	2 x 10-7	(speed factor)	0.21	0.18 unit increase	[0.12-0.24]	TRIB3	information processing speed	GCST000905	20:371300
Associations for Akirin1
Variant and risk allele	Reported trait	P-value	P-value annotation	RAF	Beta	CI	Mapped gene	Trait(s)	Study accession	Location
rs11205539-A	Eosinophil counts	3 x 10-10		0.17014	'-	'-	NDUFS5, AKIRIN1	eosinophil count	GCST90002302	1:39008125
rs4329504-G	Lymphocyte counts	5 x 10-11		0.4207	0.014635243 unit decrease	[0.01-0.019]	AL139260.1, AKIRIN1	lymphocyte count	GCST90002388	1:38985816
rs4329504-G	Monocyte count	5 x 10-11		0.4207	0.014635243 unit decrease	[0.01-0.019]	AL139260.1, AKIRIN1	monocyte count	GCST90002393	1:38985816
Associations for Epas1
Variant and risk allele	Reported trait	P-value	P-value annotation	RAF	Beta	CI	Mapped gene	Trait(s)	Study accession	Location
rs11689011-T	PR interval	2 x 10-11		0.4155	0.4488 ms increase	[0.32-0.58]	EPAS1	PR interval	GCST010320	2:46314037
rs4953346-G	Hematocrit	2 x 10-11		0.460241	0.014898218 unit increase	[0.011-0.019]	EPAS1	hematocrit	GCST90002383	2:46331069
rs4953348-G	Hemoglobin	7 x 10-10		0.460644	0.013653652 unit increase	[0.0093-0.018]	EPAS1	hemoglobin measurement	GCST90002384	2:46331293
rs7582701-C	IgG glycosylation	1 x 10-6	(IGP69)	0.0373370440481498	0.4547 unit decrease	[0.27-0.64]	EPAS1	serum IgG glycosylation measurement	GCST001848	2:46323630
rs2881324-G	Facial morphology	3 x 10-7	(Lower facial area)	0.1	62.7 unit increase	[NR]	EPAS1	facial morphology	GCST006108	2:46349755
Associations for Sirt1
Variant and risk allele	Reported trait	P-value	P-value annotation	RAF	Beta	CI	Mapped gene	Trait(s)	Study accession	Location
rs7096385-T	Atrial fibrillation	5 x 10-8		0.092	'-	[1.05-1.10]	SIRT1	atrial fibrillation	GCST006414	10:67905124
Associations for Vgll2
Variant and risk allele	Reported trait	P-value	P-value annotation	RAF	Beta	CI	Mapped gene	Trait(s)	Study accession	Location
rs210977-G	Electrocardiogram morphology (amplitude at temporal datapoints)	1 x 10-8	(134 ms)	0.883013	0.0491969 unit decrease	[0.032-0.067]	VGLL2	electrocardiography	GCST010796	6:117271324
rs13201929-?	Myopia (pathological)	3 x 10-6		0.121	'-	[NR]	ROS1, VGLL2	pathological myopia	GCST001712	6:117284828

## Sheet: S4 Metamex human exercise
Gene	Gene description	Acute endurance	Chronic endurance	Acute resistance	Chronic resistance	Inactivity
PPARGC1A	PPARGC1A (PPARG coactivator 1 alpha)	1.26229	0.116467	0.90146	0.0710988	-0.396471	Exercise up, inactivity down
VGLL2	VGLL2 (vestigial like family member 2)	0.87312	-0.0233202	0.958499	-0.0355093	-0.409293	Exercise up, inactivity down
FOXO1	FOXO1 (forkhead box O1)	0.653696	-0.144417	0.373661	-0.104504	0.0915452	Exercise up
EPAS1	EPAS1 (endothelial PAS domain protein 1)	0.412043	0.210424	0.115215	0.0406368	-0.01021	Endurance exercise up
BDKRB2	BDKRB2 (bradykinin receptor B2)	0.333771	0.00404712	-0.0449673	0.0673057	0.163081
MYOD1	MYOD1 (myogenic differentiation 1)	0.291599	-0.127343	0.288137	-0.0776144	0.0115769	Exercise up
ESRRG	ESRRG (estrogen related receptor gamma)	0.255891	-0.06377	0.343108	-0.258513	-0.135607	Exercise up
PPARGC1B	PPARGC1B (PPARG coactivator 1 beta)	0.245488	-0.0422982	0.0719382	-0.0175833	-0.292367
AKIRIN1	AKIRIN1 (akirin 1)	0.211317	-0.0433293	0.171065	-0.0604394	-0.129025	Exercise up, inactivity down
SIRT1	SIRT1 (sirtuin 1)	0.18412	-0.132877	0.421728	-0.134861	0.0917356
FOXJ3	FOXJ3 (forkhead box J3)	0.158273	-0.147533	-0.0774072	-0.101477	0.123355
TRIB3	TRIB3 (tribbles pseudokinase 3)	0.152212	0.0506743	-0.00248617	0.0119148	-0.087272
NCOR1	NCOR1 (nuclear receptor corepressor 1)	0.126397	-0.0175035	-0.0663571	-0.0285105	0.0363367
CPT1A	CPT1A (carnitine palmitoyltransferase 1A)	0.0762452	-0.0495926	0.149596	0.0490341	-0.299599
NFATC1	NFATC1 (nuclear factor of activated T cells 1)	0.07	-0.11	0.06	-0.12	-0.05
BDNF	BDNF (brain derived neurotrophic factor)	0.0177591	0.0410336	0.0780946	-0.121609	-0.084853
MAPK12	MAPK12 (mitogen-activated protein kinase 12)	-0.0425217	-0.12014	0.115644	-0.147152	-0.112896
CAMK4	CAMK4 (calcium/calmodulin dependent protein kinase IV)	-0.0860007	0.0739782	0.00112931	0.0103202	0.00327491
CCND3	CCND3 (cyclin D3)	-0.0903606	0.1191	-0.0223443	0.177708	-0.0466189	Chronic exercise up, inactivity down
SIRT3	SIRT3 (sirtuin 3)	-0.10376	0.0497691	-0.139948	0.000508928	-0.0634887
THRB	THRB (thyroid hormone receptor beta)	-0.107729	0.0178372	-0.0911974	-0.0278302	0.033918
IL15	IL15 (interleukin 15)	-0.114803	-0.121648	-0.202702	-0.020136	0.0528914
THRA	THRA (thyroid hormone receptor alpha)	-0.119758	-0.0148297	-0.168238	0.00406893	-0.0768621
NOL3	NOL3 (nucleolar protein 3)	-0.121061	-0.0451774	-0.25539	-0.00789359	-0.106615
MSTN	MSTN (myostatin)	-0.423227	-0.320196	-0.960467	-0.231567	0.669192	Exercise down, inactivity up

## Sheet: S5 String protein interaction
#node1	node2	node1_string_id	node2_string_id	neighborhood_on_chromosome	gene_fusion	phylogenetic_cooccurrence	homology	coexpression	experimentally_determined_interaction	database_annotated	automated_textmining	combined_score
Akirin1	Mstn	10090.ENSMUSP00000099696	10090.ENSMUSP00000027269	0	0	0	0	0	0	0	0.559	0.559
Bdnf	Camk4	10090.ENSMUSP00000057989	10090.ENSMUSP00000046539	0	0	0	0	0.062	0	0	0.526	0.536
Bdnf	Ppargc1a	10090.ENSMUSP00000057989	10090.ENSMUSP00000117040	0	0	0	0	0	0	0	0.582	0.582
Bdnf	Sirt1	10090.ENSMUSP00000057989	10090.ENSMUSP00000101082	0	0	0	0	0	0	0	0.593	0.593
Camk4	Bdnf	10090.ENSMUSP00000046539	10090.ENSMUSP00000057989	0	0	0	0	0.062	0	0	0.526	0.536
Ccnd3	Foxo1	10090.ENSMUSP00000040488	10090.ENSMUSP00000055308	0	0	0	0	0	0	0.194	0.321	0.429
Cpt1a	Ppargc1b	10090.ENSMUSP00000025835	10090.ENSMUSP00000074771	0	0	0	0	0.051	0	0	0.406	0.412
Cpt1a	Foxo1	10090.ENSMUSP00000025835	10090.ENSMUSP00000055308	0	0	0	0	0.061	0.058	0	0.464	0.484
Cpt1a	Sirt1	10090.ENSMUSP00000025835	10090.ENSMUSP00000101082	0	0	0	0	0	0	0	0.544	0.544
Cpt1a	Ppargc1a	10090.ENSMUSP00000025835	10090.ENSMUSP00000117040	0	0	0	0	0	0	0.629	0.752	0.904
Epas1	Thrb	10090.ENSMUSP00000024954	10090.ENSMUSP00000022304	0	0	0	0	0.062	0.090	0	0.487	0.524
Epas1	Sirt3	10090.ENSMUSP00000024954	10090.ENSMUSP00000026559	0	0	0	0	0	0.074	0.200	0.320	0.453
Epas1	Ppargc1a	10090.ENSMUSP00000024954	10090.ENSMUSP00000117040	0	0	0	0	0.061	0	0	0.449	0.461
Epas1	Esrrg	10090.ENSMUSP00000024954	10090.ENSMUSP00000027906	0	0	0	0	0	0.505	0	0.094	0.532
Epas1	Sirt1	10090.ENSMUSP00000024954	10090.ENSMUSP00000101082	0	0	0	0	0.051	0.160	0.676	0.620	0.888
Esrrg	Epas1	10090.ENSMUSP00000027906	10090.ENSMUSP00000024954	0	0	0	0	0	0.505	0	0.094	0.532
Esrrg	Ppargc1b	10090.ENSMUSP00000027906	10090.ENSMUSP00000074771	0	0	0	0	0.061	0.087	0	0.548	0.579
Esrrg	Ncor1	10090.ENSMUSP00000027906	10090.ENSMUSP00000068974	0	0	0	0	0	0.401	0.224	0.203	0.597
Esrrg	Ppargc1a	10090.ENSMUSP00000027906	10090.ENSMUSP00000117040	0	0	0	0	0.106	0.810	0.496	0.872	0.987
Foxj3	Sirt1	10090.ENSMUSP00000035746	10090.ENSMUSP00000101082	0	0	0	0	0.062	0.237	0.214	0.098	0.424
Foxo1	Thrb	10090.ENSMUSP00000055308	10090.ENSMUSP00000022304	0	0	0	0	0	0.087	0.114	0.345	0.423
Foxo1	Cpt1a	10090.ENSMUSP00000055308	10090.ENSMUSP00000025835	0	0	0	0	0.061	0.058	0	0.464	0.484
Foxo1	Sirt3	10090.ENSMUSP00000055308	10090.ENSMUSP00000026559	0	0	0	0	0.062	0.266	0.147	0.560	0.707
Foxo1	Mstn	10090.ENSMUSP00000055308	10090.ENSMUSP00000027269	0	0	0	0	0	0.044	0	0.611	0.612
Foxo1	Il15	10090.ENSMUSP00000055308	10090.ENSMUSP00000034148	0	0	0	0	0.061	0	0	0.392	0.404
Foxo1	Ccnd3	10090.ENSMUSP00000055308	10090.ENSMUSP00000040488	0	0	0	0	0	0	0.194	0.321	0.429
Foxo1	Ncor1	10090.ENSMUSP00000055308	10090.ENSMUSP00000068974	0	0	0	0	0.062	0.071	0	0.400	0.431
Foxo1	Ppargc1b	10090.ENSMUSP00000055308	10090.ENSMUSP00000074771	0	0	0	0	0	0.050	0	0.543	0.547
Foxo1	Myod1	10090.ENSMUSP00000055308	10090.ENSMUSP00000072330	0	0	0	0	0	0	0	0.618	0.618
Foxo1	Mapk12	10090.ENSMUSP00000055308	10090.ENSMUSP00000086207	0	0	0	0	0	0.066	0.600	0.133	0.648
Foxo1	Ppargc1a	10090.ENSMUSP00000055308	10090.ENSMUSP00000117040	0	0	0	0	0	0.058	0.800	0.989	0.997
Foxo1	Sirt1	10090.ENSMUSP00000055308	10090.ENSMUSP00000101082	0	0	0	0	0	0.646	0.966	0.977	0.999
Il15	Foxo1	10090.ENSMUSP00000034148	10090.ENSMUSP00000055308	0	0	0	0	0.061	0	0	0.392	0.404
Mapk12	Foxo1	10090.ENSMUSP00000086207	10090.ENSMUSP00000055308	0	0	0	0	0	0.066	0.600	0.133	0.648
Mapk12	Myod1	10090.ENSMUSP00000086207	10090.ENSMUSP00000072330	0	0	0	0	0.061	0.048	0.770	0.306	0.838
Mapk12	Ppargc1a	10090.ENSMUSP00000086207	10090.ENSMUSP00000117040	0	0	0	0	0	0.058	0.932	0.280	0.950
Mstn	Akirin1	10090.ENSMUSP00000027269	10090.ENSMUSP00000099696	0	0	0	0	0	0	0	0.559	0.559
Mstn	Foxo1	10090.ENSMUSP00000027269	10090.ENSMUSP00000055308	0	0	0	0	0	0.044	0	0.611	0.612
Mstn	Ppargc1a	10090.ENSMUSP00000027269	10090.ENSMUSP00000117040	0	0	0	0	0	0	0	0.665	0.665
Mstn	Myod1	10090.ENSMUSP00000027269	10090.ENSMUSP00000072330	0	0	0	0	0.114	0	0	0.870	0.880
Myod1	Mstn	10090.ENSMUSP00000072330	10090.ENSMUSP00000027269	0	0	0	0	0.114	0	0	0.870	0.880
Myod1	Foxo1	10090.ENSMUSP00000072330	10090.ENSMUSP00000055308	0	0	0	0	0	0	0	0.618	0.618
Myod1	Ncor1	10090.ENSMUSP00000072330	10090.ENSMUSP00000068974	0	0	0	0	0	0.130	0	0.501	0.547
Myod1	Vgll2	10090.ENSMUSP00000072330	10090.ENSMUSP00000124091	0	0	0	0	0.185	0	0	0.433	0.519
Myod1	Ppargc1a	10090.ENSMUSP00000072330	10090.ENSMUSP00000117040	0	0	0	0	0	0.131	0	0.599	0.636
Myod1	Nfatc1	10090.ENSMUSP00000072330	10090.ENSMUSP00000129001	0	0	0	0	0	0	0.629	0.266	0.716
Myod1	Mapk12	10090.ENSMUSP00000072330	10090.ENSMUSP00000086207	0	0	0	0	0.061	0.048	0.770	0.306	0.838
Myod1	Sirt1	10090.ENSMUSP00000072330	10090.ENSMUSP00000101082	0	0	0	0	0	0.131	0.676	0.953	0.986
Ncor1	Thrb	10090.ENSMUSP00000068974	10090.ENSMUSP00000022304	0	0	0	0	0	0.816	0.758	0.712	0.986
Ncor1	Sirt3	10090.ENSMUSP00000068974	10090.ENSMUSP00000026559	0	0	0	0	0	0.161	0	0.314	0.400
Ncor1	Esrrg	10090.ENSMUSP00000068974	10090.ENSMUSP00000027906	0	0	0	0	0	0.401	0.224	0.203	0.597
Ncor1	Foxo1	10090.ENSMUSP00000068974	10090.ENSMUSP00000055308	0	0	0	0	0.062	0.071	0	0.400	0.431
Ncor1	Myod1	10090.ENSMUSP00000068974	10090.ENSMUSP00000072330	0	0	0	0	0	0.130	0	0.501	0.547
Ncor1	Ppargc1a	10090.ENSMUSP00000068974	10090.ENSMUSP00000117040	0	0	0	0	0	0	0	0.590	0.590
Ncor1	Thra	10090.ENSMUSP00000068974	10090.ENSMUSP00000099428	0	0	0	0	0	0.824	0.758	0.899	0.995
Ncor1	Sirt1	10090.ENSMUSP00000068974	10090.ENSMUSP00000101082	0	0	0	0	0.052	0.755	0	0.980	0.995
Nfatc1	Myod1	10090.ENSMUSP00000129001	10090.ENSMUSP00000072330	0	0	0	0	0	0	0.629	0.266	0.716
Ppargc1a	Thrb	10090.ENSMUSP00000117040	10090.ENSMUSP00000022304	0	0	0	0	0.104	0.160	0.270	0.360	0.601
Ppargc1a	Epas1	10090.ENSMUSP00000117040	10090.ENSMUSP00000024954	0	0	0	0	0.061	0	0	0.449	0.461
Ppargc1a	Cpt1a	10090.ENSMUSP00000117040	10090.ENSMUSP00000025835	0	0	0	0	0	0	0.629	0.752	0.904
Ppargc1a	Sirt3	10090.ENSMUSP00000117040	10090.ENSMUSP00000026559	0	0	0	0	0.064	0.069	0.231	0.877	0.907
Ppargc1a	Mstn	10090.ENSMUSP00000117040	10090.ENSMUSP00000027269	0	0	0	0	0	0	0	0.665	0.665
Ppargc1a	Esrrg	10090.ENSMUSP00000117040	10090.ENSMUSP00000027906	0	0	0	0	0.106	0.810	0.496	0.872	0.987
Ppargc1a	Foxo1	10090.ENSMUSP00000117040	10090.ENSMUSP00000055308	0	0	0	0	0	0.058	0.800	0.989	0.997
Ppargc1a	Bdnf	10090.ENSMUSP00000117040	10090.ENSMUSP00000057989	0	0	0	0	0	0	0	0.582	0.582
Ppargc1a	Ncor1	10090.ENSMUSP00000117040	10090.ENSMUSP00000068974	0	0	0	0	0	0	0	0.590	0.590
Ppargc1a	Myod1	10090.ENSMUSP00000117040	10090.ENSMUSP00000072330	0	0	0	0	0	0.131	0	0.599	0.636
Ppargc1a	Mapk12	10090.ENSMUSP00000117040	10090.ENSMUSP00000086207	0	0	0	0	0	0.058	0.932	0.280	0.950
Ppargc1a	Thra	10090.ENSMUSP00000117040	10090.ENSMUSP00000099428	0	0	0	0	0.074	0.160	0.270	0.380	0.600
Ppargc1a	Sirt1	10090.ENSMUSP00000117040	10090.ENSMUSP00000101082	0	0	0	0	0	0.716	0.676	0.987	0.998
Ppargc1b	Cpt1a	10090.ENSMUSP00000074771	10090.ENSMUSP00000025835	0	0	0	0	0.051	0	0	0.406	0.412
Ppargc1b	Esrrg	10090.ENSMUSP00000074771	10090.ENSMUSP00000027906	0	0	0	0	0.061	0.087	0	0.548	0.579
Ppargc1b	Foxo1	10090.ENSMUSP00000074771	10090.ENSMUSP00000055308	0	0	0	0	0	0.050	0	0.543	0.547
Ppargc1b	Sirt1	10090.ENSMUSP00000074771	10090.ENSMUSP00000101082	0	0	0	0	0	0	0	0.506	0.506
Sirt1	Epas1	10090.ENSMUSP00000101082	10090.ENSMUSP00000024954	0	0	0	0	0.051	0.160	0.676	0.620	0.888
Sirt1	Cpt1a	10090.ENSMUSP00000101082	10090.ENSMUSP00000025835	0	0	0	0	0	0	0	0.544	0.544
Sirt1	Foxj3	10090.ENSMUSP00000101082	10090.ENSMUSP00000035746	0	0	0	0	0.062	0.237	0.214	0.098	0.424
Sirt1	Foxo1	10090.ENSMUSP00000101082	10090.ENSMUSP00000055308	0	0	0	0	0	0.646	0.966	0.977	0.999
Sirt1	Bdnf	10090.ENSMUSP00000101082	10090.ENSMUSP00000057989	0	0	0	0	0	0	0	0.593	0.593
Sirt1	Ncor1	10090.ENSMUSP00000101082	10090.ENSMUSP00000068974	0	0	0	0	0.052	0.755	0	0.980	0.995
Sirt1	Myod1	10090.ENSMUSP00000101082	10090.ENSMUSP00000072330	0	0	0	0	0	0.131	0.676	0.953	0.986
Sirt1	Ppargc1b	10090.ENSMUSP00000101082	10090.ENSMUSP00000074771	0	0	0	0	0	0	0	0.506	0.506
Sirt1	Ppargc1a	10090.ENSMUSP00000101082	10090.ENSMUSP00000117040	0	0	0	0	0	0.716	0.676	0.987	0.998
Sirt3	Epas1	10090.ENSMUSP00000026559	10090.ENSMUSP00000024954	0	0	0	0	0	0.074	0.200	0.320	0.453
Sirt3	Ncor1	10090.ENSMUSP00000026559	10090.ENSMUSP00000068974	0	0	0	0	0	0.161	0	0.314	0.400
Sirt3	Foxo1	10090.ENSMUSP00000026559	10090.ENSMUSP00000055308	0	0	0	0	0.062	0.266	0.147	0.560	0.707
Sirt3	Ppargc1a	10090.ENSMUSP00000026559	10090.ENSMUSP00000117040	0	0	0	0	0.064	0.069	0.231	0.877	0.907
Thra	Thrb	10090.ENSMUSP00000099428	10090.ENSMUSP00000022304	0	0	0	0.978	0.068	0	0.930	0.889	0.933
Thra	Ncor1	10090.ENSMUSP00000099428	10090.ENSMUSP00000068974	0	0	0	0	0	0.824	0.758	0.899	0.995
Thra	Ppargc1a	10090.ENSMUSP00000099428	10090.ENSMUSP00000117040	0	0	0	0	0.074	0.160	0.270	0.380	0.600
Thrb	Foxo1	10090.ENSMUSP00000022304	10090.ENSMUSP00000055308	0	0	0	0	0	0.087	0.114	0.345	0.423
Thrb	Epas1	10090.ENSMUSP00000022304	10090.ENSMUSP00000024954	0	0	0	0	0.062	0.090	0	0.487	0.524
Thrb	Ppargc1a	10090.ENSMUSP00000022304	10090.ENSMUSP00000117040	0	0	0	0	0.104	0.160	0.270	0.360	0.601
Thrb	Thra	10090.ENSMUSP00000022304	10090.ENSMUSP00000099428	0	0	0	0.978	0.068	0	0.930	0.889	0.933
Thrb	Ncor1	10090.ENSMUSP00000022304	10090.ENSMUSP00000068974	0	0	0	0	0	0.816	0.758	0.712	0.986
Vgll2	Myod1	10090.ENSMUSP00000124091	10090.ENSMUSP00000072330	0	0	0	0	0.185	0	0	0.433	0.519

## Sheet: S6 Tissue-specific expression
Muscle fiber gene	Skeletal Muscle	Adipose Subcutaneous	Adipose viscedral	Adrenal gland	Liver	Lung	Full gene name
MAPK12	84.34	8	10	2	0.8	11	Mitogen-activated protein kinase 12
FOXO1	66.78	61	45	11	8	36	Forkhead box O1
NOL3	55.89	34.5	31.31	59.3	18	36.4	Nucleolar protein 3 (apoptosis repressor with CARD domain)
VGLL2	48.22	0	0	0	0	0	Vestigial like family member 2
EPAS1	36.76	424.8	402.5	68.7	60.92	1031	Endothelial PAS domain protein 1
THRA	28.78	41.46	33.81	32.17	3.27	34.64	Thyroid hormone receptor alpha
FOXJ3	25.61	33.71	26.6	14.71	7.57	29.64	Forkhead box J3
AKIRIN1	22.83	41.03	49.63	35.19	26.59	54.1	Akirin 1
MYOD1	21.71	0	0	0	0	0	Myogenic differentiation 1
NCOR1	16.47	21.48	19.31	14.46	9.6	23.83	Nuclear receptor co-repressor 1
NFATC1	11.83	9.91	8.38	2.69	0.7	10.84	Nuclear factor of activated T cells, cytoplasmic, calcineurin dependent 1
PPARGC1A	11.02	1.88	2.28	1.89	9.21	3.29	Peroxisome proliferative activated receptor, gamma, coactivator 1 alpha
SIRT1	9.6	20.23	16.7	19.02	5.33	14.4	Sirtuin 1
SIRT3	9.52	12.29	9.82	12.3	11.03	12.5	Sirtuin 3
THRB	8.86	10.27	7.26	4.37	4.95	4.8	Thyroid hormone receptor beta
CPT1A	5.97	37.84	35.02	33.24	31.55	36.91	Carnitine palmitoyltransferase 1a, liver
CCND3	5.14	41.08	45.82	66.18	5.39	81.94	Cyclin D3
PPARGC1B	2.53	2.68	2.94	0.74	0.91	5.05	Peroxisome proliferative activated receptor, gamma, coactivator 1 beta
IL15	1.41	4.5	3.83	1.43	0.66	4.94	Interleukin 15
ESRRG	1.4	0.05	0	2.4	0	0	Estrogen-related receptor gamma
MSTN	1.28	0	0	0	0	0	Myostatin
TRIB3	0.57	4.79	6.49	8.25	29.81	14.14	Tribbles pseudokinase 3
BDKRB2	0.3	6.45	13.76	0.8	0.1	1.9	Bradykinin receptor, beta 2
BDNF	0.05	0.1	0.3	0.1	0	1.1	Brain derived neurotrophic factor
CAMK4	0.02	0.2	0.3	0.1	0.3	1.3	Calcium/calmodulin-dependent protein kinase IV

## Sheet: S7 ToppGene enrichment
1: GO: Molecular Function [Display Chart] 24 input genes in category / 195 annotations before applied cutoff / 19415 genes in category
	ID	Name	Source	pValue	FDR B&H	FDR B&Y	Bonferroni	Genes from Input	Genes in Annotation
1	GO:0140110	transcription regulator activity		9.191e-06	0.001792	0.01049	0.001792	15	1980
2	GO:0008134	transcription factor binding		0.0001264	0.01232	0.07212	0.02465	9	740
3	GO:1990841	promoter-specific chromatin binding		0.001651	0.0805	0.4711	0.3219	4	71
4	GO:0035257	nuclear hormone receptor binding		0.001651	0.0805	0.4711	0.322	5	167
5	GO:0003712	transcription coregulator activity		0.00251	0.09789	0.573	0.4895	7	530
2: GO: Biological Process [Display Chart] 24 input genes in category / 2087 annotations before applied cutoff / 20213 genes in category
	ID	Name	Source	pValue	FDR B&H	FDR B&Y	Bonferroni	Genes from Input	Genes in Annotation
2	GO:0009725	response to hormone		1.022e-08	1.067e-05	8.771e-05	2.134e-05	13	971
5	GO:0043500	muscle adaptation		9.652e-09	345.9E-9	2.854e-05	2.075e-05	8	155
12	GO:0061061	muscle structure development		5.075e-07	8.494e-05	0.0007008	0.001091	11	755
13	GO:0043501	skeletal muscle adaptation		5.136e-07	8.494e-05	0.0007008	0.001104	5	34
22	GO:0003012	muscle system process		7.088e-06	0.0006927	0.005715	0.01524	9	525
44	GO:0007517	muscle organ development		0.00036	0.01759	0.1451	0.7739	7	394
45	GO:0043502	regulation of muscle adaptation		0.0004178	0.01987	0.164	0.8983	5	126
49	GO:0014857	regulation of skeletal muscle cell proliferation		0.000926	0.04063	0.3352	1.991	3	16
3: GO: Cellular Component [Display Chart] 24 input genes in category / 98 annotations before applied cutoff / 20269 genes in category
	ID	Name	Source	pValue	FDR B&H	FDR B&Y	Bonferroni	Genes from Input	Genes in Annotation
1	GO:0000785	chromatin		7.929e-05	0.007771	0.04015	0.007771	11	1294
2	GO:0005694	chromosome		0.002812	0.1378	0.712	0.2756	11	1845
3	GO:0000791	euchromatin		0.02436	0.7072	3.654	2.387	3	48
4	GO:0005739	mitochondrion		0.02887	0.7072	3.654	2.829	10	1897
5	GO:0016604	nuclear body		0.3901	7.647	39.51	38.23	6	856
4: Human Phenotype [Display Chart] 11 input genes in category / 937 annotations before applied cutoff / 4707 genes in category
	ID	Name	Source	pValue	FDR B&H	FDR B&Y	Bonferroni	Genes from Input	Genes in Annotation
1	HP:0002930	Impaired sensitivity to thyroid hormone		0.004975	4.662	34.59	4.662	2	2
2	HP:0031508	Abnormal thyroid hormone level		0.02972	13.92	103.3	27.85	2	4
5: Mouse Phenotype [Display Chart] 24 input genes in category / 1622 annotations before applied cutoff / 11516 genes in category
	ID	Name	Source	pValue	FDR B&H	FDR B&Y	Bonferroni	Genes from Input	Genes in Annotation
9	MP:0005288	abnormal oxygen consumption		0.01453	2.446	19.56	24.28	5	151
21	MP:0005369	muscle phenotype		0.04231	3.238	25.9	70.7	11	1342
28	MP:0004039	abnormal cardiac cell glucose uptake		0.122	7.283	58.26	203.9	2	8
30	MP:0000738	impaired muscle contractility		0.1437	7.797	62.37	240.1	5	244
6: Domain [Display Chart] 24 input genes in category / 158 annotations before applied cutoff / 18735 genes in category
	ID	Name	Source	pValue	FDR B&H	FDR B&Y	Bonferroni	Genes from Input	Genes in Annotation
1	3.30.1600.10	-	Gene3D	0.009422	0.3058	1.725	1.489	2	4
2	IPR026591	Sirtuin cat small dom	InterPro	0.009422	0.3058	1.725	1.489	2	4
3	IPR001728	ThyrH rcpt	InterPro	0.01569	0.3058	1.725	2.479	2	5
4	PF00105	zf-C4	Pfam	0.02704	0.3058	1.725	4.273	3	46
5	PS00031	NUCLEAR REC DBD 1	PROSITE	0.02704	0.3058	1.725	4.273	3	46
7: Pathway [Display Chart] 19 input genes in category / 263 annotations before applied cutoff / 10254 genes in category
	ID	Name	Source	pValue	FDR B&H	FDR B&Y	Bonferroni	Genes from Input	Genes in Annotation
1	M39590	Energy Metabolism	MSigDB C2 BIOCARTA (v7.3)	1.973e-07	5.189e-05	0.0003192	5.189e-05	6	48
2	M32	Signaling events mediated by HDAC Class III	MSigDB C2 BIOCARTA (v7.3)	7.913e-07	0.0001041	0.0006401	0.0002081	5	26
3	M39439	NAD metabolism, sirtuins and aging	MSigDB C2 BIOCARTA (v7.3)	0.0008817	0.0773	0.4755	0.2319	3	11
4	M39505	Adipogenesis	MSigDB C2 BIOCARTA (v7.3)	0.003175	0.2088	1.284	0.835	5	131
5	M39544	Mitochondrial Gene Expression	MSigDB C2 BIOCARTA (v7.3)	0.006028	0.3171	1.95	1.585	3	20
8: Pubmed [Display Chart] 24 input genes in category / 13940 annotations before applied cutoff / 38789 genes in category
	ID	Name	Source	pValue	FDR B&H	FDR B&Y	Bonferroni	Genes from Input	Genes in Annotation
1	18660489	Multiple genetic variants along candidate pathways influence plasma high-density lipoprotein cholesterol concentrations.	Pubmed	1.996e-11	2.782e-07	2.816e-06	2.782e-07	9	250
2	26453307	Hepatic FOXO1 Target Genes Are Co-regulated by Thyroid Hormone via RICTOR Protein Deacetylation and MTORC2-AKT Protein Inhibition.	Pubmed	3.939e-09	2.745e-05	0.0002778	5.49e-05	4	7
3	20059953	A systems approach reveals that the myogenesis genome network is regulated by the transcriptional repressor RP58.	Pubmed	8.511e-09	3.955e-05	0.0004002	0.0001186	12	1401
4	12470660	PGC-1 and PERC, coactivators of the estrogen receptor-related receptor gamma.	Pubmed	2.082e-07	0.0005805	0.005874	0.002902	3	3
5	29514081	ERRγ Promotes Angiogenesis, Mitochondrial Biogenesis, and Oxidative Remodeling in PGC1α/β-Deficient Muscle.	Pubmed	2.082e-07	0.0005805	0.005874	0.002902	3	3
9: Interaction [Display Chart] 24 input genes in category / 1344 annotations before applied cutoff / 19258 genes in category
	ID	Name	Source	pValue	FDR B&H	FDR B&Y	Bonferroni	Genes from Input	Genes in Annotation
1	int:NCOA1	NCOA1 interactions		1.222e-07	0.0001643	0.001278	0.0001643	7	124
2	int:PPARGC1A	PPARGC1A interactions		5.384e-07	0.0003618	0.002815	0.0007236	6	80
3	int:RXRA	RXRA interactions		2.519e-05	0.0103	0.08011	0.03386	6	151
4	int:THRB	THRB interactions		4.637e-05	0.0103	0.08011	0.06232	5	81
5	int:NRIP1	NRIP1 interactions		4.934e-05	0.0103	0.08011	0.06631	5	82
10: Cytoband [Display Chart] 24 input genes in category / 24 annotations before applied cutoff / 34661 genes in category
	ID	Name	Source	pValue	FDR B&H	FDR B&Y	Bonferroni	Genes from Input	Genes in Annotation
1	14q32.1-q32.2	14q32.1-q32.2		1.384	11.08	41.82	33.23	1	2
2	13q14.1	13q14.1		1.384	11.08	41.82	33.23	1	2
3	20p13-p12.2	20p13-p12.2		1.384	11.08	41.82	33.23	1	2
4	2p21-p16	2p21-p16		2.767	16.6	62.69	66.41	1	4
5	4p15.1	4p15.1		4.837	23.22	87.67	116.1	1	7
11: Transcription Factor Binding Site [Display Chart] 24 input genes in category / 477 annotations before applied cutoff / 24869 genes in category
	ID	Name	Source	pValue	FDR B&H	FDR B&Y	Bonferroni	Genes from Input	Genes in Annotation
1	V$WHN B	V$WHN B	TFBS	0.001201	0.3492	2.356	0.5729	5	200
2	TGANTCA V$AP1 C	TGANTCA V$AP1 C	TFBS	0.001464	0.3492	2.356	0.6985	8	919
3	CTTTAAR UNKNOWN	CTTTAAR UNKNOWN	TFBS	0.007385	0.9248	6.239	3.523	7	799
4	CACGTG V$MYC Q2	CACGTG V$MYC Q2	TFBS	0.007755	0.9248	6.239	3.699	7	805
5	V$OCT1 02	V$OCT1 02	TFBS	0.0263	2.055	13.86	12.54	4	182
12: Gene Family [Display Chart] 19 input genes in category / 14 annotations before applied cutoff / 18194 genes in category
	ID	Name	Source	pValue	FDR B&H	FDR B&Y	Bonferroni	Genes from Input	Genes in Annotation
1	71	Nuclear hormone receptors	genenames.org	0.01726	0.1514	0.4923	0.2416	3	49
2	938	Sirtuins	genenames.org	0.02163	0.1514	0.4923	0.3028	2	7
3	508	Forkhead boxes	genenames.org	0.9095	4.244	13.8	12.73	2	43
4	223	Bradykinin receptors	genenames.org	2.088	7.306	23.76	29.23	1	2
5	367	Vestigial like family	genenames.org	4.171	11.68	37.97	58.39	1	4
13: Coexpression [Display Chart] 24 input genes in category / 2694 annotations before applied cutoff / 23951 genes in category
	ID	Name	Source	pValue	FDR B&H	FDR B&Y	Bonferroni	Genes from Input	Genes in Annotation
1	M2434	Transcripts dependent upon IRS1 and IRS2 [GeneID=3667, 8660] for normal expression in liver.	MSigDB C2: CGP Curated Gene Sets (v7.3)	0.002421	5.087	43.12	6.523	4	96
2	18812457-Table2	Mouse Viral Mercader08 51genes	GeneSigDB	0.005665	5.087	43.12	15.26	3	35
3	15895078-Table2	Mouse StemCell Tseng05 37genes	GeneSigDB	0.005665	5.087	43.12	15.26	3	35
4	15489324-TableS2	Human Messina 04 1962genes TranscriptionFactors	GeneSigDB	0.02661	14.81	125.5	71.68	9	1741
5	19074870-SuppTable4a	Human StemCell Harris08 490genes	GeneSigDB	0.04048	14.81	125.5	109	5	398
14: Coexpression Atlas [Display Chart] 24 input genes in category / 1236 annotations before applied cutoff / 21555 genes in category
	ID	Name	Source	pValue	FDR B&H	FDR B&Y	Bonferroni	Genes from Input	Genes in Annotation
1	JC fibro 1000	JC fibro top-relative-expression-ranked 1000	PCBC	0.007553	9.336	71.86	9.336	8	994
2	gudmap developingLowerUrinaryTract e14.5 Genital tubercle F 500 k5	DevelopingLowerUrinaryTract e14.5 Genital tubercle F emap-6706 k-means-cluster#5 top-relative-expression-ranked 500	Gudmap Mouse MOE430.2	0.05063	29.32	225.7	62.58	3	65
3	gudmap developingLowerUrinaryTract e13.5 bladder neck-urethr epithel 500 k2	DevelopingLowerUrinaryTract e13.5 bladder neck-urethr epithel emap-30875 k-means-cluster#2 top-relative-expression-ranked 500	Gudmap Mouse MOE430.2	0.07464	29.32	225.7	92.26	3	74
4	gudmap developingLowerUrinaryTract e14.5 Genital tubercle F 500	DevelopingLowerUrinaryTract e14.5 Genital tubercle F emap-6706 top-relative-expression-ranked 500	Gudmap Mouse MOE430.2	0.09488	29.32	225.7	117.3	5	429
5	gudmap developingLowerUrinaryTract P1 bladder J 1000 k4	DevelopingLowerUrinaryTract P1 bladder J emap-30374 k-means-cluster#4 top-relative-expression-ranked 1000	Gudmap Mouse MOE430.2	0.1337	33.05	254.4	165.3	3	90
15: ToppCell Atlas [Display Chart] 24 input genes in category / 4100 annotations before applied cutoff / 36976 genes in category
	ID	Name	Source	pValue	FDR B&H	FDR B&Y	Bonferroni	Genes from Input	Genes in Annotation
1	e785135262f4c9cc66c403bf362bb34643b212c5	human hepatoblastoma-Tumor cells-T8|Tumor cells / Sample and Cell Type and Tumor Cluster (all cells)	Human Hepatoblastoma Atlas	0.006902	28.3	251.7	28.3	4	192
2	59450e9f580555091b159fbbe0a0756e51bcd9ad	TCGA-Endometrium-Primary Tumor-Endometrial Adenocarcinoma-Serous adenocarcinoma-5|TCGA-Endometrium / Sample Type by Project: Shred V9	TCGA OncoMap	0.1424	29.4	261.6	583.6	3	157
3	f230d23618a6487f2664efb2c677e0a4559e2bf4	facs-Diaphragm-Limb Muscle-24m-Mesenchymal-skeletal muscle satellite cell|Diaphragm / Tongue Heart Limb Muscle Aorta Diaphragm - method, tissue, subtissue, age, lineage, cell ontology and free annotation	Mouse Aging Atlas- Tabula Muris Senis	0.1927	29.4	261.6	790.3	3	174
4	b7f5492ce8098f7eb0aef30ee558d00738d59d0e	BAL-Mild-Epithelial-Epithelial-AT1/AT2|Mild / Location, Disease Group, Cell group, Cell class and sub cluster (2021.03.01)	Integration of Multiple Sampling Location of COVID-19 Patients	0.1927	29.4	261.6	790.3	3	174
5	cafe4d6b5f08d8888e9db6e196c66df991c03e7b	BAL-Mild-Epithelial-Epithelial-AT1/AT2-|Mild / Location, Disease Group, Cell group, Cell class and sub cluster (2021.03.01)	Integration of Multiple Sampling Location of COVID-19 Patients	0.1927	29.4	261.6	790.3	3	174
16: Computational [Display Chart] 19 input genes in category / 143 annotations before applied cutoff / 10012 genes in category
No results to display
17: MicroRNA [Display Chart] 24 input genes in category / 5140 annotations before applied cutoff / 72243 genes in category
	ID	Name	Source	pValue	FDR B&H	FDR B&Y	Bonferroni	Genes from Input	Genes in Annotation
1	hsa-miR-338-5p		MirDB	2.308e-08	0.0001186	0.001082	0.0001186	9	1019
2	hsa-miR-338-5p:PITA	hsa-miR-338-5p:PITA TOP	PITA	1.048e-07	0.0002693	0.002457	0.0005387	8	773
3	hsa-miR-148b-3p:TargetScan	hsa-miR-148b-3p	TargetScan	6.152e-07	0.0006324	0.005769	0.003162	7	577
4	hsa-miR-148a-3p:TargetScan	hsa-miR-148a-3p	TargetScan	6.152e-07	0.0006324	0.005769	0.003162	7	577
5	hsa-miR-152-3p:TargetScan	hsa-miR-152-3p	TargetScan	6.152e-07	0.0006324	0.005769	0.003162	7	577
18: Drug [Display Chart] 24 input genes in category / 8880 annotations before applied cutoff / 24261 genes in category
	ID	Name	Source	pValue	FDR B&H	FDR B&Y	Bonferroni	Genes from Input	Genes in Annotation
1	ctd:D008063	Thioctic Acid	CTD	1.634e-07	0.001451	0.01403	0.001451	7	162
2	ctd:D010656	Phenylephrine	CTD	6.769e-07	0.003005	0.02906	0.006011	9	505
3	CID000005562	A25618	Stitch	1.4e-06	0.003605	0.03485	0.01243	10	777
4	ctd:C072553	benzyloxycarbonylleucyl-leucyl-leucine aldehyde	CTD	1.624e-06	0.003605	0.03485	0.01442	9	558
5	ctd:D003474	Curcumin	CTD	3.358e-06	0.005963	0.05766	0.02982	10	851
19: Disease [Display Chart] 23 input genes in category / 2097 annotations before applied cutoff / 19365 genes in category
	ID	Name	Source	pValue	FDR B&H	FDR B&Y	Bonferroni	Genes from Input	Genes in Annotation
1	C0025517	Metabolic Diseases	DisGeNET BeFree	1.268e-07	0.0002659	0.002187	0.0002659	12	937
2	C0015695	Fatty Liver	DisGeNET BeFree	5.662e-06	0.005818	0.04785	0.01187	10	757
3	C0029408	Degenerative polyarthritis	DisGeNET BeFree	8.323e-06	0.005818	0.04785	0.01745	13	1694
4	C0238478	Transient erythroblastopenia of childhood	DisGeNET BeFree	1.319e-05	0.006914	0.05687	0.02765	4	23
5	C1561643	Chronic Kidney Diseases	DisGeNET BeFree	8.431e-05	0.03536	0.2909	0.1768	10	1006

## Sheet: S8 Secreted
List of secreted genes/proteins	List of extracellular matrix (ECM) proteins	Your gene list	Overlap secreted genes & your genes	Overlap ECM genes & your genes
A1BG	5430419D17Rik	Bdkrb2	bdnf	bdnf
A2M	Abi3bp	Bdnf	mstn	il15
A2ML1	Adipoq	Camk4		mstn
A4GNT	Aebp1	Ccnd3
AADACL2	Agrn	Cpt1a
AANAT	Ambn	Foxj3
ABCG1	Amelx	Foxo1
ABHD1	AW551984	Mapk12
ABHD10	Bglap2	Mstn
ABHD14A	Bglap3	Myod1
ABHD15	Bmper	Nol3
ABI3BP	Bsph1	Ppargc1a
AC008641.1	Bsph2	Thra
AC009133.22	Cdcp2	Thrb
AC009491.2	Cilp	Esrrg
AC011513.3	Cilp2	Il15
AC136352.5	Coch	Ncor1
AC145212.4	Colq	Ppargc1b
AC233755.1	Comp	Sirt3
ACACB	Creld1	Trib3
ACAN	Creld2	Akirin1
ACE	Crim1	Epas1
ACHE	Crispld1	Sirt1
ACP2	Crispld2	Vgll2
ACP5	Ctgf
ACP6	Cthrc1
ACPP	Cyr61
ACR	Ddx26b
ACRBP	Dmbt1
ACRV1	Dmp1
ACSF2	Dpt
ACTL10	Dspp
ACVR1	Ecm1
ACVR1C	Ecm2
ACVRL1	Edil3
ACYP1	Efemp1
ACYP2	Efemp2
ADAM10	Egfem1
ADAM12	Egflam
ADAM15	Eln
ADAM17	Emid1
ADAM18	Emilin1
ADAM22	Emilin2
ADAM28	Emilin3
ADAM29	Fbln1
ADAM32	Fbln2
ADAM33	Fbln5
ADAM7	Fbln7
ADAM8	Fbn1
ADAM9	Fbn2
ADAMDEC1	Fga
ADAMTS1	Fgb
ADAMTS10	Fgg
ADAMTS12	Fgl1
ADAMTS13	Fgl2
ADAMTS14	Fn1
ADAMTS15	Fndc1
ADAMTS16	Fndc7
ADAMTS17	Fndc8
ADAMTS18	Fras1
ADAMTS19	Gas6
ADAMTS2	Gldn
ADAMTS20	Hmcn1
ADAMTS3	Hmcn2
ADAMTS5	Ibsp
ADAMTS6	Igfals
ADAMTS7	Igfbp1
ADAMTS8	Igfbp2
ADAMTS9	Igfbp3
ADAMTSL1	Igfbp4
ADAMTSL2	Igfbp5
ADAMTSL3	Igfbp6
ADAMTSL4	Igfbp7
ADAMTSL5	Igfbpl1
ADCK1	Igsf10
ADCYAP1	Kcp
ADCYAP1R1	Lama1
ADGRA3	Lama2
ADGRB2	Lama3
ADGRD1	Lama4
ADGRE3	Lama5
ADGRE5	Lamb1
ADGRF1	Lamb2
ADGRG1	Lamb3
ADGRG5	Lamc1
ADGRG6	Lamc2
ADGRV1	Lamc3
ADI1	Lgi1
ADIG	Lgi2
ADIPOQ	Lgi3
ADM	Lgi4
ADM2	Lrg1
ADM5	Ltbp1
ADPGK	Ltbp2
ADPRHL2	Ltbp3
AEBP1	Ltbp4
AFM	Matn1
AFP	Matn2
AGA	Matn3
AGER	Matn4
AGK	Mepe
AGPS	Mfap1a
AGR2	Mfap1b
AGR3	Mfap2
AGRN	Mfap3
AGRP	Mfap4
AGT	Mfap5
AGTPBP1	Mfge8
AGTRAP	Mgp
AHCYL2	Mmrn1
AHSG	Mmrn2
AIG1	Ndnf
AK4	Nell1
AKAP10	Nell2
AKR1C1	Nid1
AL356289.1	Nid2
AL589743.1	Nov
ALAS2	Npnt
ALB	Ntn1
ALDH9A1	Ntn3
ALDOA	Ntn4
ALG1	Ntn5
ALG5	Ntng1
ALG9	Ntng2
ALKBH1	Oit3
ALKBH5	Otog
ALPI	Otogl
ALPL	Otol1
ALPP	Papln
ALPPL2	Pcolce
AMBN	Pcolce2
AMBP	Postn
AMELX	Pxdn
AMELY	Reln
AMH	Rspo1
AMICA1	Rspo2
AMPD1	Rspo3
AMTN	Rspo4
AMY1A	Sbspon
AMY1B	Slamf6
AMY1C	Slit1
AMY2A	Slit2
AMY2B	Slit3
ANG	Smoc1
ANGEL1	Smoc2
ANGPT1	Sned1
ANGPT2	Sparc
ANGPT4	Sparcl1
ANGPTL1	Spon1
ANGPTL2	Spon2
ANGPTL3	Spp1
ANGPTL4	Srpx
ANGPTL5	Srpx2
ANGPTL6	Sspo
ANGPTL7	Svep1
ANK1	Tecta
ANKDD1A	Tectb
ANKRD54	Tgfbi
ANKRD60	Thbs1
ANO7	Thbs2
ANOS1	Thbs3
ANTXR1	Thbs4
AOAH	Thsd4
AOC1	Tinag
AOC2	Tinagl1
AOC3	Tnc
AP000721.4	Tnfaip6
AP000866.1	Tnn
APBB1	Tnr
APCDD1	Tnxb
APCS	Tsku
APELA	Tspear
APLN	Vit
APLP2	Vtn
APOA1	Vwa1
APOA1BP	Vwa2
APOA2	Vwa3a
APOA4	Vwa3b
APOA5	Vwa5a
APOB	Vwa5b1
APOC1	Vwa5b2
APOC2	Vwa7
APOC3	Vwa9
APOC4	Vwce
APOC4-APOC2	Vwde
APOD	Vwf
APOE	Wisp1
APOF	Wisp2
APOH	Wisp3
APOL1	Zp1
APOL3	Zp2
APOM	Zp3
APOOL	Zp3r
ARCN1	Zpld1
ARFIP2	Col10a1
ARHGAP36	Col11a1
ARHGAP6	Col11a2
ARHGEF4	Col12a1
ARL16	Col13a1
ARMC5	Col14a1
ARNTL	Col15a1
ARSA	Col16a1
ARSB	Col17a1
ARSE	Col18a1
ARSG	Col19a1
ARSI	Col1a1
ARSK	Col1a2
ART3	Col20a1
ART4	Col22a1
ART5	Col23a1
ARTN	Col24a1
ASAH1	Col25a1
ASAH2	Col26a1
ASCL1	Col27a1
ASIP	Col28a1
ASPN	Col2a1
ASTL	Col3a1
ATAD5	Col4a1
ATAT1	Col4a2
ATG2A	Col4a3
ATG5	Col4a4
ATMIN	Col4a5
ATP13A1	Col4a6
ATP5F1	Col5a1
ATP6AP1	Col5a2
ATP6AP2	Col5a3
ATPAF1	Col6a1
AUH	Col6a2
AVP	Col6a3
AXIN2	Col6a4
AZGP1	Col6a5
AZU1	Col6a6
B2M	Col7a1
B3GALNT1	Col8a1
B3GALNT2	Col8a2
B3GALT1	Col9a1
B3GALT4	Col9a2
B3GALT5	Col9a3
B3GALT6	Acan
B3GAT3	Aspn
B3GLCT	Bcan
B3GNT3	Bgn
B3GNT4	Chad
B3GNT6	Chadl
B3GNT7	Dcn
B3GNT8	Epyc
B3GNT9	Esm1
B4GALNT1	Fmod
B4GALNT3	Hapln1
B4GALNT4	Hapln2
B4GALT4	Hapln3
B4GALT5	Hapln4
B4GALT6	Hspg2
B4GAT1	Impg1
B9D1	Impg2
BACE2	Kera
BAGE5	Lum
BCAM	Ncan
BCAN	Nepn
BCAP29	Nyx
BCAR1	Ogn
BCHE	Omd
BCKDHB	Optc
BDNF	Podn
BGLAP	Podnl1
BGN	Prelp
BLVRB	Prg2
BMP1	Prg3
BMP10	Prg4
BMP15	Spock1
BMP2	Spock2
BMP3	Spock3
BMP4	Srgn
BMP6	Vcan
BMP7	Anxa1
BMP8A	Anxa10
BMP8B	Anxa11
BMPER	Anxa13
BNC1	Anxa2
BOC	Anxa3
BOD1	Anxa4
BOLA1	Anxa5
BPI	Anxa6
BPIFA1	Anxa7
BPIFA2	Anxa8
BPIFA3	Anxa9
BPIFB1	C1qa
BPIFB2	C1qb
BPIFB3	C1qc
BPIFB4	C1ql1
BPIFB6	C1ql2
BPIFC	C1ql3
BRF1	C1ql4
BRINP1	C1qtnf1
BRINP2	C1qtnf2
BRINP3	C1qtnf3
BSG	C1qtnf4
BSPH1	C1qtnf5
BST1	C1qtnf6
BTBD17	C1qtnf7
BTD	C1qtnf9
BTN2A2	Cd209a
BTN3A1	Cd209b
BTN3A2	Cd209d
BTN3A3	Clc
C10orf10	Clec10a
C10orf99	Clec11a
C11orf1	Clec12a
C11orf24	Clec12b
C11orf45	Clec14a
C11orf94	Clec18a
C12orf10	Clec1a
C12orf49	Clec1b
C12orf73	Clec2d
C12orf76	Clec2e
C14orf80	Clec2g
C14orf93	Clec2h
C16orf89	Clec2i
C16orf90	Clec2j
C17orf67	Clec2l
C17orf75	Clec3a
C17orf99	Clec3b
C18orf54	Clec4a1
C19orf47	Clec4a2
C19orf70	Clec4a3
C19orf80	Clec4a4
C1GALT1	Clec4b1
C1orf127	Clec4b2
C1orf159	Clec4d
C1orf198	Clec4e
C1orf234	Clec4f
C1orf54	Clec4g
C1orf56	Clec4n
C1QA	Clec5a
C1QB	Clec7a
C1QC	Clec9a
C1QL1	Colec10
C1QL2	Colec11
C1QL3	Colec12
C1QL4	Cspg4
C1QTNF1	Cspg5
C1QTNF2	Elfn1
C1QTNF3	Elfn2
C1QTNF4	Emcn
C1QTNF5	Fcna
C1QTNF7	Fcnb
C1QTNF8	Frem1
C1QTNF9	Frem2
C1QTNF9B	Frem3
C1R	Gm7534
C1RL	Gm9573
C1S	Gpc1
C2	Gpc2
C21orf33	Gpc3
C21orf62	Gpc4
C22orf15	Gpc5
C22orf46	Gpc6
C2CD2	Grem1
C2orf40	Grifin
C2orf66	Hpx
C2orf69	Itln1
C2orf78	Itlnb
C3	Lgals1
C3orf33	Lgals12
C3orf58	Lgals2
C4A	Lgals3
C4B	Lgals4
C4BPA	Lgals6
C4BPB	Lgals7
C4orf26	Lgals8
C4orf48	Lgals9
C5	Lgalsl
C5orf46	Lman1
C6	Lman1l
C6orf120	Mbl1
C6orf15	Mbl2
C6orf25	Muc1
C6orf58	Muc13
C7	Muc15
C7orf57	Muc16
C7orf73	Muc19
C8A	Muc2
C8B	Muc20
C8G	Muc3
C9	Muc4
C9orf47	Muc5ac
CA10	Muc5b
CA11	Muc6
CA6	Mucl1
CA9	Ovgp1
CABLES1	Parm1
CABP1	Plxdc1
CACNA2D1	Plxdc2
CACNA2D4	Plxna1
CADM3	Plxna2
CALCA	Plxna3
CALCB	Plxna4
CALCR	Plxnb1
CALCRL	Plxnb2
CALR	Plxnb3
CALR3	Plxnc1
CALU	Plxnd1
CAMK2D	Prol1
CAMP	Reg1
CANX	Reg2
CARKD	Reg3a
CARM1	Reg3b
CARNS1	Reg3d
CARTPT	Reg3g
CASQ1	Reg4
CASQ2	Sdc1
CATSPERG	Sdc2
CBLN1	Sdc3
CBLN2	Sdc4
CBLN3	Sema3a
CBLN4	Sema3b
CCBE1	Sema3c
CCDC108	Sema3d
CCDC112	Sema3e
CCDC129	Sema3f
CCDC134	Sema3g
CCDC149	Sema4a
CCDC3	Sema4b
CCDC80	Sema4c
CCDC85A	Sema4d
CCDC88B	Sema4f
CCER2	Sema4g
CCK	Sema5a
CCL1	Sema5b
CCL11	Sema6a
CCL13	Sema6b
CCL14	Sema6c
CCL15	Sema6d
CCL16	Sema7a
CCL17	Sfta2
CCL18	Sftpa1
CCL19	Sftpb
CCL2	Sftpc
CCL20	Sftpd
CCL21	1810010H24Rik
CCL22	2010005H15Rik
CCL23	8030411F24Rik
CCL24	9230104L09Rik
CCL25	A2m
CCL26	Adam10
CCL27	Adam11
CCL28	Adam12
CCL3	Adam15
CCL3L3	Adam17
CCL4	Adam18
CCL4L2	Adam19
CCL5	Adam1a
CCL7	Adam1b
CCL8	Adam2
CCNB1IP1	Adam20
CCNL1	Adam21
CCNL2	Adam22
CD14	Adam23
CD160	Adam24
CD164	Adam25
CD177	Adam26a
CD1E	Adam26b
CD2	Adam28
CD200	Adam29
CD200R1	Adam3
CD22	Adam30
CD226	Adam32
CD24	Adam33
CD276	Adam34
CD300A	Adam39
CD300LB	Adam4
CD300LF	Adam5
CD300LG	Adam6a
CD3D	Adam6b
CD4	Adam7
CD40	Adam8
CD44	Adam9
CD48	Adamdec1
CD5	Adamts1
CD55	Adamts10
CD59	Adamts12
CD5L	Adamts13
CD6	Adamts14
CD68	Adamts15
CD7	Adamts16
CD79A	Adamts17
CD80	Adamts18
CD86	Adamts19
CD8A	Adamts2
CD8B	Adamts20
CD99	Adamts3
CDC23	Adamts4
CDC40	Adamts5
CDC45	Adamts6
CDCP1	Adamts7
CDCP2	Adamts8
CDH1	Adamts9
CDH11	Adamtsl1
CDH13	Adamtsl2
CDH17	Adamtsl3
CDH18	Adamtsl4
CDH19	Adamtsl5
CDH23	Agt
CDH5	AI182371
CDHR1	Ambp
CDHR4	Astl
CDHR5	BC048546
CDKN2A	BC051665
CDNF	BC100530
CDON	BC117090
CDSN	Bmp1
CEACAM16	Cd109
CEACAM18	Cela1
CEACAM19	Cela2a
CEACAM5	Cela3b
CEACAM7	Cpn2
CEACAM8	Cst10
CECR1	Cst11
CECR5	Cst12
CEL	Cst13
CELA2A	Cst3
CELA2B	Cst6
CELA3A	Cst7
CELA3B	Cst8
CEMIP	Cst9
CEP89	Csta1
CER1	Cstb
CERCAM	Cstl1
CERS1	Cts3
CES1	Cts6
CES3	Cts7
CES4A	Cts8
CES5A	Ctsa
CETP	Ctsb
CFB	Ctsc
CFC1	Ctsd
CFC1B	Ctse
CFD	Ctsf
CFDP1	Ctsg
CFH	Ctsh
CFHR1	Ctsj
CFHR2	Ctsk
CFHR3	Ctsl
CFHR4	Ctsll3
CFHR5	Ctsm
CFI	Ctso
CFP	Ctsq
CGA	Ctsr
CGB	Ctss
CGB1	Ctsw
CGB2	Ctsz
CGB5	Egln1
CGB7	Egln2
CGB8	Egln3
CGREF1	Elane
CH507-9B2.3	F10
CHAD	F12
CHADL	F13a1
CHEK2	F13b
CHGA	F2
CHGB	F7
CHI3L1	F9
CHI3L2	Fam20a
CHIA	Fam20b
CHID1	Fam20c
CHIT1	Gm10334
CHL1	Gm13011
CHN1	Gm4758
CHPF	Gm4787
CHPF2	Gm5347
CHRD	Gm5409
CHRDL1	Gm5416
CHRDL2	Gm5483
CHRNA2	Gm5771
CHRNA5	Habp2
CHRNB1	Hpse
CHRND	Hpse2
CHST1	Hrg
CHST10	Htra1
CHST11	Htra3
CHST13	Htra4
CHST4	Hyal1
CHST5	Hyal2
CHST6	Hyal3
CHST7	Hyal4
CHST8	Hyal5
CHSY1	Hyal6
CHSY3	Itih1
CHTF8	Itih2
CILP	Itih3
CILP2	Itih4
CIRH1A	Itih5
CKLF	Kazald1
CKMT1A	Kng1
CKMT1B	Kng2
CLCA1	Ky
CLCF1	Lepre1
CLDN15	Leprel1
CLDN7	Leprel2
CLDND1	Lox
CLEC11A	Loxl1
CLEC16A	Loxl2
CLEC18A	Loxl3
CLEC18B	Loxl4
CLEC18C	Masp1
CLEC19A	Masp2
CLEC2B	Mep1a
CLEC3A	Mep1b
CLEC3B	Mmp10
CLGN	Mmp11
CLN5	Mmp12
CLPS	Mmp13
CLPSL1	Mmp14
CLPSL2	Mmp15
CLPX	Mmp16
CLSTN3	Mmp17
CLU	Mmp19
CLUL1	Mmp1a
CMA1	Mmp1b
CMPK1	Mmp2
CNBD1	Mmp20
CNDP1	Mmp21
CNPY2	Mmp23
CNPY3	Mmp24
CNPY4	Mmp25
CNTFR	Mmp27
CNTN1	Mmp28
CNTN2	Mmp3
CNTN3	Mmp7
CNTN4	Mmp8
CNTN5	Mmp9
CNTNAP2	Mug2
CNTNAP3	Ngly1
CNTNAP3B	Ogfod1
COASY	Ogfod2
COCH	P4ha1
COG3	P4ha2
COL10A1	P4ha3
COL11A1	P4htm
COL11A2	Pamr1
COL12A1	Pappa
COL14A1	Pappa2
COL15A1	Pcsk5
COL16A1	Pcsk6
COL18A1	Plat
COL19A1	Plau
COL1A1	Plg
COL1A2	Plod1
COL20A1	Plod2
COL21A1	Plod3
COL22A1	Prss1
COL24A1	Prss12
COL26A1	Prss2
COL27A1	Prss3
COL28A1	Pzp
COL2A1	Serpina10
COL3A1	Serpina11
COL4A1	Serpina12
COL4A2	Serpina1a
COL4A3	Serpina1b
COL4A4	Serpina1c
COL4A5	Serpina1d
COL4A6	Serpina1e
COL5A1	Serpina1f
COL5A2	Serpina3a
COL5A3	Serpina3b
COL6A1	Serpina3c
COL6A2	Serpina3f
COL6A3	Serpina3g
COL6A5	Serpina3k
COL6A6	Serpina3m
COL7A1	Serpina3n
COL8A1	Serpina5
COL8A2	Serpina6
COL9A1	Serpina7
COL9A2	Serpina9
COL9A3	Serpinb10
COLEC10	Serpinb11
COLEC11	Serpinb12
COLGALT1	Serpinb13
COLGALT2	Serpinb1a
COLQ	Serpinb1b
COMP	Serpinb1c
COPS6	Serpinb2
COQ6	Serpinb3a
CORT	Serpinb3b
CP	Serpinb3c
CPA1	Serpinb3d
CPA2	Serpinb5
CPA3	Serpinb6a
CPA4	Serpinb6b
CPA6	Serpinb6c
CPAMD8	Serpinb6d
CPB1	Serpinb7
CPB2	Serpinb8
CPE	Serpinb9
CPM	Serpinb9b
CPN1	Serpinb9c
CPN2	Serpinb9d
CPO	Serpinb9e
CPQ	Serpinb9f
CPVL	Serpinb9g
CPXM1	Serpinc1
CPXM2	Serpind1
CPZ	Serpine1
CR1L	Serpine2
CRB2	Serpine3
CREG1	Serpinf1
CREG2	Serpinf2
CRELD1	Serping1
CRELD2	Serpinh1
CRH	Serpini1
CRHBP	Serpini2
CRHR1	Slpi
CRHR2	Spam1
CRISP1	Spinkl
CRISP2	St14
CRISP3	Stfa1
CRISPLD2	Stfa2
CRLF1	Stfa2l1
CRP	Stfa3
CRTAC1	Sulf1
CRTAP	Sulf2
CRY2	Tgm1
CSAD	Tgm2
CSF1	Tgm3
CSF1R	Tgm4
CSF2	Tgm5
CSF2RA	Tgm6
CSF3	Tgm7
CSGALNACT1	Timp1
CSH1	Timp2
CSH2	Timp3
CSHL1	Timp4
CSN1S1	Tll1
CSN2	Tll2
CSN3	Tmprss15
CST1	Tpbpa
CST11	Tpbpb
CST2	Try10
CST3	Try4
CST4	Try5
CST5	U06147
CST6	Amh
CST7	Angpt1
CST8	Angpt2
CST9	Angpt4
CST9L	Angptl1
CSTL1	Angptl2
CT55	Angptl3
CTB-60B18.6	Angptl4
CTBS	Angptl6
CTD-2313N18.7	Angptl7
CTD-2370N5.3	Areg
CTGF	Artn
CTHRC1	Bdnf
CTLA4	Bmp10
CTNS	Bmp15
CTRB1	Bmp2
CTRB2	Bmp3
CTRC	Bmp4
CTRL	Bmp5
CTSA	Bmp6
CTSB	Bmp7
CTSC	Bmp8a
CTSD	Bmp8b
CTSE	Brinp2
CTSF	Brinp3
CTSG	Btc
CTSH	Cbln1
CTSK	Cbln2
CTSL	Cbln3
CTSO	Cbln4
CTSS	Ccbe1
CTSV	Ccl1
CTSW	Ccl11
CTSZ	Ccl12
CUBN	Ccl17
CUTA	Ccl19
CX3CL1	Ccl2
CXADR	Ccl20
CXCL1	Ccl21a
CXCL10	Ccl21b
CXCL11	Ccl21c
CXCL12	Ccl22
CXCL13	Ccl24
CXCL14	Ccl25
CXCL17	Ccl26
CXCL2	Ccl27a
CXCL3	Ccl28
CXCL5	Ccl3
CXCL6	Ccl4
CXCL8	Ccl5
CXCL9	Ccl6
CXorf36	Ccl7
CYB5D2	Ccl8
CYHR1	Ccl9
CYP17A1	Cfc1
CYP20A1	Chrd
CYP21A2	Chrdl1
CYP26B1	Chrdl2
CYP2A6	Clcf1
CYP2A7	Cntf
CYP2B6	Crhbp
CYP2C18	Crlf1
CYP2C19	Crlf3
CYP2C8	Crnn
CYP2C9	Csf1
CYP2E1	Csf2
CYP2F1	Csf3
CYP2J2	Ctf1
CYP2R1	Ctf2
CYP2S1	Cx3cl1
CYP2W1	Cxcl1
CYP46A1	Cxcl10
CYP4F11	Cxcl11
CYP4F2	Cxcl12
CYR61	Cxcl13
CYTL1	Cxcl14
D2HGDH	Cxcl15
DAG1	Cxcl2
DAND5	Cxcl3
DAO	Cxcl5
DAZAP2	Cxcl9
DBH	Dhh
DBNL	Ebi3
DCD	Eda
DCN	Egf
DDIAS	Egfl6
DDOST	Egfl7
DDR1	Egfl8
DDR2	Epgn
DDT	Epo
DDX17	Ereg
DDX20	Fam132a
DDX25	Fam132b
DDX28	Fasl
DEAF1	Fgf1
DEF8	Fgf10
DEFA1	Fgf11
DEFA1B	Fgf12
DEFA3	Fgf13
DEFA4	Fgf14
DEFA5	Fgf15
DEFA6	Fgf16
DEFB1	Fgf17
DEFB103A	Fgf18
DEFB103B	Fgf2
DEFB104A	Fgf20
DEFB104B	Fgf21
DEFB105A	Fgf22
DEFB105B	Fgf23
DEFB106A	Fgf3
DEFB106B	Fgf4
DEFB107A	Fgf5
DEFB107B	Fgf6
DEFB108B	Fgf7
DEFB110	Fgf8
DEFB113	Fgf9
DEFB114	Fgfbp1
DEFB115	Fgfbp3
DEFB116	Figf
DEFB118	Flg
DEFB119	Flg2
DEFB121	Flt3l
DEFB123	Frzb
DEFB124	Fst
DEFB125	Fstl1
DEFB126	Fstl3
DEFB127	Gdf1
DEFB128	Gdf10
DEFB129	Gdf11
DEFB130	Gdf15
DEFB131	Gdf2
DEFB132	Gdf3
DEFB133	Gdf5
DEFB134	Gdf6
DEFB135	Gdf7
DEFB136	Gdf9
DEFB4A	Gdnf
DEFB4B	Gh
DFNA5	Gm13271
DFNB31	Gm13272
DGCR2	Gm13275
DHH	Gm13276
DHRS4	Gm13277
DHRS4L2	Gm13278
DHRS7	Gm13279
DHRS7C	Gm13283
DHRS9	Gm13285
DHRSX	Gm13287
DHX29	Gm13288
DHX30	Gm13289
DHX8	Gm13290
DIO2	Gm13306
DIXDC1	Gm5849
DKK1	Hbegf
DKK2	Hcfc1
DKK3	Hcfc2
DKK4	Hgf
DKKL1	Hgfac
DLG4	Hhip
DLK1	Hrnr
DLL1	Ifna1
DLL3	Ifna11
DMBT1	Ifna12
DMKN	Ifna13
DMP1	Ifna14
DMRTA2	Ifna15
DNAAF5	Ifna16
DNAH14	Ifna2
DNAJB11	Ifna4
DNAJB9	Ifna5
DNAJC25-GNG10	Ifna6
DNAJC3	Ifna7
DNASE1	Ifna9
DNASE1L1	Ifnab
DNASE1L2	Ifnb1
DNASE1L3	Ifne
DNASE2	Ifng
DNASE2B	Ifnk
DPEP1	Ifnz
DPEP2	Igf1
DPEP3	Igf2
DPF3	Ihh
DPP4	Il10
DPP7	Il11
DPT	Il12a
DRAXIN	Il12b
DSE	Il13
DSG2	Il15
DSPP	Il16
DST	Il17a
DUOX1	Il17b
DYNLT3	Il17c
E2F5	Il17d
EBAG9	Il17f
EBI3	Il18
ECHDC1	Il19
ECM1	Il1a
ECM2	Il1b
ECSIT	Il1f10
EDDM3A	Il1f5
EDDM3B	Il1f6
EDEM2	Il1f8
EDEM3	Il1f9
EDIL3	Il1rn
EDN1	Il2
EDN2	Il20
EDN3	Il22
EDNRB	Il23a
EFEMP1	Il24
EFEMP2	Il25
EFNA1	Il3
EFNA2	Il34
EFNA4	Il4
EGFL6	Il5
EGFL7	Il6
EGFL8	Il7
EGFLAM	Il9
EGFR	Inha
EHBP1	Inhba
EHF	Inhbb
EHMT1	Inhbc
EHMT2	Inhbe
EIF2AK1	Ins1
ELANE	Ins2
ELN	Insl3
ELP2	Insl5
ELSPBP1	Insl6
EMC1	Ism1
EMC10	Ism2
EMC9	Kitl
EMCN	Lefty1
EMID1	Lefty2
EMILIN1	Lep
EMILIN2	Lif
EMILIN3	Lta
ENAM	Ltb
ENDOG	Mdk
ENDOU	Megf10
ENHO	Megf11
ENO4	Megf6
ENPP6	Megf8
ENPP7	Megf9
ENTPD5	Mst1
ENTPD8	Mstn
EOGT	Ngf
EPCAM	Nodal
EPDR1	Nrg1
EPGN	Nrg2
EPHA10	Nrg3
EPHA3	Nrg4
EPHA4	Nrtn
EPHA7	Ntf3
EPHA8	Ntf5
EPHB2	Osm
EPHB4	Pdgfa
EPHX3	Pdgfb
EPO	Pdgfc
EPPIN	Pdgfd
EPPIN-WFDC6	Pf4
EPS15	Pgf
EPS8L1	Pik3ip1
EPX	Ppbp
EPYC	Prl
EQTN	Prl2a1
ERAP1	Prl2b1
ERAP2	Prl2c1
ERBB3	Prl2c2
ERLIN1	Prl2c3
ERLIN2	Prl2c4
ERN1	Prl2c5
ERN2	Prl3a1
ERO1A	Prl3b1
ERO1B	Prl3c1
ERP27	Prl3d1
ERP29	Prl3d2
ERP44	Prl3d3
ERV3-1	Prl4a1
ESM1	Prl5a1
ESRP1	Prl6a1
EXOG	Prl7a1
EXTL1	Prl7a2
EXTL2	Prl7b1
F10	Prl7c1
F11	Prl7d1
F12	Prl8a1
F13B	Prl8a2
F2	Prl8a6
F2R	Prl8a8
F2RL3	Prl8a9
F5	Pspn
F7	Ptn
F8	Rptn
F9	S100a1
FABP6	S100a10
FAM107B	S100a11
FAM131A	S100a13
FAM132A	S100a14
FAM132B	S100a16
FAM150A	S100a2
FAM150B	S100a3
FAM171A1	S100a4
FAM171B	S100a5
FAM172A	S100a6
FAM175A	S100a7a
FAM177A1	S100a8
FAM179B	S100a9
FAM180A	S100b
FAM189A1	S100g
FAM198A	S100z
FAM19A1	Scube1
FAM19A2	Scube2
FAM19A3	Scube3
FAM19A4	Sfrp1
FAM19A5	Sfrp2
FAM20A	Sfrp4
FAM20C	Sfrp5
FAM213A	Shh
FAM26D	Tchh
FAM46B	Tchhl1
FAM57A	Tdgf1
FAM78A	Tgfa
FAM96A	Tgfb1
FAM9B	Tgfb2
FAP	Tgfb3
FAS	Thpo
FAT1	Tnf
FBLN1	Tnfsf10
FBLN2	Tnfsf11
FBLN5	Tnfsf12
FBLN7	Tnfsf12tnfsf13
FBN1	Tnfsf13
FBN2	Tnfsf13b
FBN3	Tnfsf14
FBXW7	Tnfsf15
FCAR	Tnfsf18
FCGBP	Tnfsf4
FCGR1B	Tnfsf8
FCGR3A	Tnfsf9
FCGRT	Tpo
FCMR	Vegfa
FCN1	Vegfb
FCN2	Vegfc
FCN3	Vwc2
FCRL1	Vwc2l
FCRL3	Wfikkn1
FCRL5	Wfikkn2
FCRLA	Wif1
FCRLB	Wnt1
FDCSP	Wnt10a
FETUB	Wnt10b
FGA	Wnt11
FGB	Wnt16
FGF10	Wnt2
FGF17	Wnt2b
FGF18	Wnt3
FGF19	Wnt3a
FGF21	Wnt4
FGF22	Wnt5a
FGF23	Wnt5b
FGF3	Wnt6
FGF4	Wnt7a
FGF5	Wnt7b
FGF7	Wnt8a
FGF8	Wnt8b
FGFBP1	Wnt9a
FGFBP2	Wnt9b
FGFBP3	Xcl1
FGFR1	1110031I02Rik
FGFR2	Ccl16-ps
FGFR3	E030019B13Rik
FGFR4	Gm13286
FGFRL1	Gm13308
FGG	Gm5065
FGL1	Gm8080
FGL2	Ifna10
FHL1	Itih5l-ps
FHOD3	Muc12
FIBIN	Serpina3h
FICD	Serpina4-ps1
FIGF	Tnxa
FJX1	Zfp91-Cntf
FKBP10	Zp4-ps
FKBP11
FKBP14
FKBP2
FKBP7
FKBP9
FLT1
FLT4
FMO1
FMO2
FMO3
FMO5
FMOD
FN1
FNDC1
FNDC7
FOCAD
FOLR2
FOLR3
FOXRED2
FP325331.1
FPGS
FRAS1
FREM1
FREM3
FRMPD2
FRZB
FSHB
FSHR
FST
FSTL1
FSTL3
FSTL4
FSTL5
FTCDNL1
FUCA1
FUCA2
FURIN
FUT10
FUT11
FXN
FXR1
FXYD3
GABBR1
GABRA1
GABRA2
GABRA5
GABRG3
GABRP
GAL
GAL3ST1
GAL3ST2
GAL3ST3
GALC
GALNS
GALNT10
GALNT12
GALNT15
GALNT2
GALNT6
GALNT8
GALNTL6
GALP
GANAB
GARS
GAS1
GAS6
GAST
GBA
GBGT1
GC
GCG
GCGR
GCNT7
GCSH
GDF1
GDF10
GDF11
GDF15
GDF2
GDF3
GDF5
GDF6
GDF7
GDF9
GDNF
GFOD2
GFPT2
GFRA2
GFRA4
GGA2
GGH
GGT1
GGT5
GH1
GH2
GHDC
GHRH
GHRHR
GHRL
GIF
GIP
GKN1
GKN2
GLA
GLB1
GLB1L
GLB1L2
GLCE
GLG1
GLIPR1
GLIPR1L1
GLIS3
GLMP
GLRB
GLS
GLT6D1
GLTPD2
GLUD1
GM2A
GML
GNAS
GNLY
GNPTG
GNRH1
GNRH2
GNS
GOLM1
GORAB
GOT2
GP2
GP6
GPC2
GPC5
GPC6
GPD2
GPER1
GPHA2
GPHB5
GPIHBP1
GPLD1
GPNMB
GPR162
GPX3
GPX4
GPX5
GPX6
GPX7
GREM1
GREM2
GRHL3
GRIA2
GRIA3
GRIA4
GRIK2
GRIN2B
GRM2
GRM3
GRM5
GRN
GRP
GSG1
GSN
GTDC1
GTPBP10
GUCA2A
GUCA2B
GUSB
GVQW1
GXYLT1
GXYLT2
GYLTL1B
GYPB
GZMA
GZMB
GZMH
GZMK
GZMM
H6PD
HABP2
HADHB
HAMP
HAPLN1
HAPLN2
HAPLN3
HAPLN4
HARS2
HAVCR1
HCCS
HCRT
HEATR5A
HEPH
HEXA
HEXB
HFE2
HGF
HGFAC
HHIP
HHIPL1
HHIPL2
HHLA1
HHLA2
HIBADH
HINT2
HLA-A
HLA-C
HLA-DOA
HLA-DPA1
HLA-DQA1
HLA-DQB1
HLA-DQB2
HMCN1
HMCN2
HMGCL
HMHA1
HMSD
HP
HPR
HPSE
HPSE2
HPX
HRC
HRG
HRSP12
HS2ST1
HS3ST1
HS6ST1
HS6ST3
HSD11B1L
HSD17B11
HSD17B7
HSP90B1
HSPA13
HSPA5
HSPG2
HTATIP2
HTN1
HTN3
HTRA1
HTRA3
HTRA4
HYAL1
HYAL2
HYAL3
HYOU1
IAPP
IBSP
ICAM1
ICAM2
ICAM4
ID1
IDE
IDNK
IDS
IDUA
IFI27L2
IFI30
IFNA1
IFNA10
IFNA13
IFNA14
IFNA16
IFNA17
IFNA2
IFNA21
IFNA4
IFNA5
IFNA6
IFNA7
IFNA8
IFNAR1
IFNB1
IFNE
IFNG
IFNGR1
IFNL1
IFNL2
IFNL3
IFNLR1
IFNW1
IGF1
IGF2
IGFALS
IGFBP1
IGFBP2
IGFBP3
IGFBP4
IGFBP5
IGFBP6
IGFBP7
IGFBPL1
IGFL1
IGFL2
IGFL3
IGFLR1
IGIP
IGLON5
IGSF1
IGSF10
IGSF11
IGSF21
IGSF8
IGSF9
IHH
IL10
IL11
IL11RA
IL12B
IL12RB1
IL12RB2
IL13
IL13RA1
IL15RA
IL17A
IL17B
IL17C
IL17D
IL17F
IL17RA
IL17RC
IL17RE
IL18BP
IL18R1
IL18RAP
IL19
IL1R1
IL1R2
IL1RAP
IL1RL1
IL1RL2
IL1RN
IL2
IL20
IL20RA
IL21
IL22
IL22RA2
IL23A
IL24
IL25
IL26
IL27
IL2RB
IL3
IL31
IL31RA
IL32
IL34
IL3RA
IL4
IL4I1
IL4R
IL5
IL5RA
IL6
IL6R
IL6ST
IL7
IL7R
IL9
ILDR1
ILDR2
IMP4
IMPG1
INHA
INHBA
INHBB
INHBC
INHBE
INPP5A
INS
INS-IGF2
INSL3
INSL4
INSL5
INSL6
INTS3
IPO11
IPO9
IQCF6
IRAK3
IRS4
ISLR
ISLR2
ISM1
ISM2
ITGA4
ITGA9
ITGAL
ITGAX
ITGB1
ITGB2
ITGB3
ITGB7
ITGBL1
ITIH1
ITIH2
ITIH3
ITIH4
ITIH5
ITIH6
ITLN1
ITLN2
IZUMO1R
IZUMO4
JCHAIN
JMJD8
JSRP1
KANSL2
KAZALD1
KCNIP3
KCNK7
KCNN4
KCNU1
KCP
KDELC1
KDELC2
KDM1A
KDM3B
KDM6A
KDM7A
KDSR
KERA
KIAA0100
KIAA0319
KIAA1324
KIFC2
KIR2DL4
KIR3DX1
KIRREL2
KISS1
KLHL11
KLHL22
KLK1
KLK10
KLK11
KLK12
KLK13
KLK14
KLK15
KLK2
KLK3
KLK4
KLK5
KLK6
KLK7
KLK8
KLK9
KLKB1
KNDC1
KNG1
KRBA2
KREMEN2
KRTDAP
L1CAM
L3MBTL2
LA16c-380H5.3
LACE1
LACRT
LACTB
LAG3
LAIR2
LALBA
LAMA1
LAMA2
LAMA3
LAMA4
LAMA5
LAMB1
LAMB2
LAMB3
LAMB4
LAMC1
LAMC2
LAMC3
LAMP3
LAT
LAT2
LBP
LCAT
LCN1
LCN10
LCN12
LCN15
LCN2
LCN6
LCN8
LCN9
LCORL
LDLR
LDLRAD2
LEAP2
LECT2
LEFTY1
LEFTY2
LEP
LFNG
LGALS3BP
LGI1
LGI2
LGI3
LGI4
LGMN
LGR4
LHB
LHCGR
LIF
LIFR
LILRA1
LILRA2
LILRB3
LIME1
LINGO1
LIPA
LIPC
LIPF
LIPG
LIPH
LIPK
LIPM
LIPN
LMAN2
LMNTD1
LNX1
LOX
LOXL1
LOXL2
LOXL3
LOXL4
LPA
LPL
LPO
LRAT
LRCH3
LRCOL1
LRFN4
LRFN5
LRG1
LRP1
LRP11
LRP1B
LRP2
LRP4
LRPAP1
LRRC17
LRRC32
LRRC3B
LRRC4B
LRRC70
LRRN3
LRRTM1
LRRTM2
LRRTM4
LRTM2
LSR
LST1
LTA
LTBP1
LTBP2
LTBP3
LTBP4
LTBR
LTF
LTK
LUM
LUZP2
LVRN
LY6E
LY6G5B
LY6G6D
LY6G6E
LY6H
LY6K
LY86
LY96
LYG1
LYG2
LYNX1
LYPD1
LYPD2
LYPD4
LYPD6
LYPD6B
LYPD8
LYZ
LYZL4
LYZL6
M6PR
MAD1L1
MAG
MAGT1
MALSU1
MAMDC2
MAN2B1
MAN2B2
MANBA
MANEAL
MANF
MANSC1
MAP3K9
MASP1
MASP2
MATN1
MATN2
MATN3
MATN4
MATR3
MATR3
MAU2
MAZ
MBD6
MBL2
MBNL1
MCCC1
MCCD1
MCEE
MCF2L
MCFD2
MDFIC
MDGA1
MDK
MED20
MEGF10
MEGF6
MEI1
MEI4
MEIS1
MEIS3
MEPE
MESDC2
MEST
MET
METRN
METRNL
METTL17
METTL24
METTL7B
METTL9
MEX3C
MFAP2
MFAP3
MFAP3L
MFAP4
MFAP5
MFGE8
MFI2
MFNG
MGA
MGAT2
MGAT3
MGAT4A
MGAT4B
MGAT4D
MGLL
MGP
MGST2
MIA
MIA2
MIA3
MICU1
MIER1
MINOS1-NBL1
MINPP1
MLEC
MLN
MLXIP
MLXIPL
MMP1
MMP10
MMP11
MMP12
MMP13
MMP14
MMP17
MMP19
MMP2
MMP20
MMP21
MMP25
MMP26
MMP27
MMP28
MMP3
MMP7
MMP8
MMP9
MMRN1
MMRN2
MOXD1
MPO
MPPED1
MPZL1
MR1
MRPL2
MRPL21
MRPL22
MRPL24
MRPL27
MRPL32
MRPL34
MRPL35
MRPL52
MRPL55
MRPS14
MRPS22
MRPS28
MS4A14
MS4A3
MSH3
MSH5
MSLN
MSMB
MSRA
MSRB2
MSRB3
MST1
MSTN
MT1G
MTHFD2
MTMR14
MTRNR2L11
MTRR
MTTP
MTX2
MUC1
MUC13
MUC20
MUC3A
MUC5AC
MUC5B
MUC6
MUC7
MUCL1
MXRA5
MXRA7
MYDGF
MYL1
MYOC
MYRFL
MZB1
N4BP2L2
NAA38
NAAA
NAGA
NAGLU
NAGS
NAPSA
NBL1
NCAM1
NCAN
NCBP2-AS2
NCSTN
NDNF
NDP
NDUFA10
NDUFB5
NDUFS8
NDUFV1
NECAB3
NELL1
NELL2
NENF
NETO1
NFASC
NFE2L1
NFE2L3
NGEF
NGF
NGLY1
NGRN
NHLRC3
NID1
NID2
NKG7
NLGN3
NLGN4Y
NLRP5
NMB
NME1
NME1-NME2
NME3
NMS
NMU
NOA1
NODAL
NOG
NOMO3
NOS1AP
NOTCH3
NOTUM
NOV
NPB
NPC2
NPFF
NPFFR2
NPHS1
NPNT
NPPA
NPPB
NPPC
NPS
NPTX1
NPTX2
NPTXR
NPVF
NPW
NPY
NQO2
NRCAM
NRG1
NRN1L
NRP1
NRP2
NRTN
NRXN1
NRXN2
NT5C3A
NT5DC3
NT5E
NTF3
NTF4
NTM
NTN1
NTN3
NTN4
NTN5
NTNG1
NTNG2
NTS
NUBPL
NUCB1
NUCB2
NUDT19
NUDT9
NUP155
NUP214
NUP85
NXPE3
NXPE4
NXPH1
NXPH2
NXPH3
NXPH4
NYX
OAF
OBP2A
OBP2B
OC90
OCLN
ODAM
OGG1
OGN
OIT3
OLFM1
OLFM2
OLFM3
OLFM4
OLFML1
OLFML2A
OLFML2B
OLFML3
OMD
OMG
OOSP2
OPCML
OPTC
ORAI1
ORM1
ORM2
ORMDL2
OS9
OSCAR
OSM
OSMR
OSTN
[truncated: 919 more rows]

## Sheet: S9 Exercise & phosphoproteomics
Potts et al J Physiol (2017)
Study aim: Phosphoproteomic analysis of the effects of electrically evoked maximal-intensity contractions on protein phosphorylation in mouse skeletal muscle
Gene Name	Phosphorylation Site(s)	Log2(Contraction/Control)	p-value
Vgll2	S(261)	0.360202	0.0676
Hoffmann et al Cell Metabolism (2015)
Study aim: Phosphoproteomic analysis of human skeletal muscle biopsies from untrained healthy males before and after a single high-intensity exercise bout
Gene name	Phosphorylation site(s)	Log2fold change	p-value	Significance (+/-1.5-fold and P<0.05)
FOXO1	Q12778_S287	-0.322635	na
MAPK12	P53778_Y185;B5MDL5_Y95	0.339213	na
MAPK12	P53778_NANA;B5MDL5_NANA	0.54924	na
MAPK12	P53778_S362;B5MDL5_S272	0.773216	na	+
Nol3 - [NOL3_HUMAN]|Nucleolar protein 3 OS	O60936-2_T114;B4DFL0_T176;H3BUP2_T114;H3BUN4_T114;H3BM67_T114;J3QLT7_T37;J3QLT7_T37;J3QLT7_T37;J3QLT7_T37	-0.019352	na
Nol3 - [NOL3_HUMAN]|Nucleolar protein 3 OS	O60936-2_T149;B4DFL0_T211;H3BUP2_T149;H3BUN4_T149;J3QLT7_T72	-0.0441705	na
NCOR1	O75376_S1281;O75376-2_S1297	-0.15103	na
NCOR1	O75376_S1322;O75376-2_S1338	-0.0643824	na
NCOR1	O75376_S1472;O75376-2_S1488;B4DJ25_S56;E7EVK1_S103	0.104445	na
NCOR1	Q5T0F9_S530;Q5T0F9-2_S524;Q5T0F9-3_S215;Q8N2S1_S98;Q8N2S1-3_S61;O75376_S1758;O75376_S1758;O75376_S1758;O75376_S1758;O75376-2_S1774;B4DJ25_S342;H7C1U3_S444;E7EVK1_S389	0.326247	na
NCOR1	O75376_T1522;O75376-2_T1538;B4DJ25_T106;E7EVK1_T153	-0.154615	na
NCOR1	O75376_S157;O75376-2_S157;O75376-3_S48;E7EW50_S157;J3KS51_S157;E7EVU5_S157;E7EVU5_S157;E7EVU5_S157;E7EVU5_S157	-0.117205	na
NCOR1	O75376_S224;O75376-2_S224;O75376-3_S115;E7EW50_S224;J3KS51_S224;E7EVU5_S224;E7EVU5_S224;E7EVU5_S224;E7EVU5_S224	-0.297285	na
SIRT1	Q96EB6_S27;Q96EB6-2_S27	0.0692836	na

[truncated: 2 more sheets: S10 EXAC human genetics, S11 Muscle human proteome]
